# Supplementary material for: Inhibition of cGAS-STING by JQ1 alleviates oxidative stress-induced retina inflammation and degeneration
Source: PubMed Central journal article supplement (PMC9433402; doi:10.1038/s41418-022-00967-4), 2022-03-28

# Fig.1E

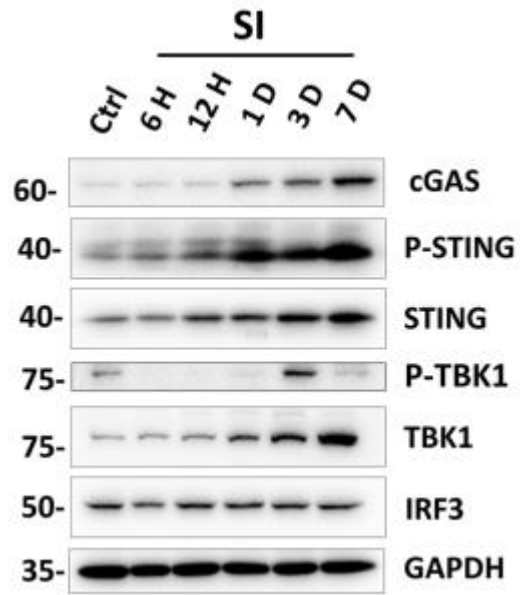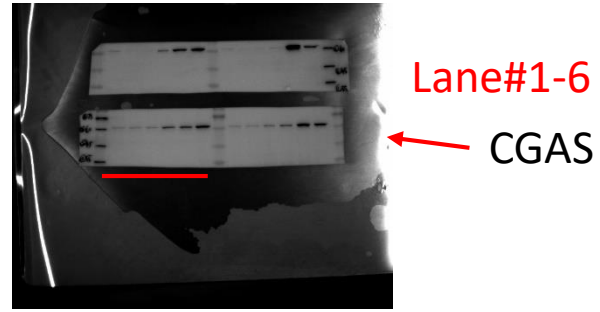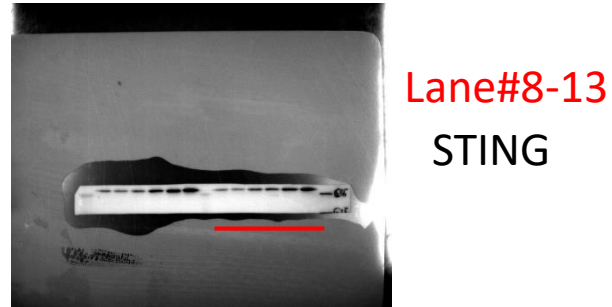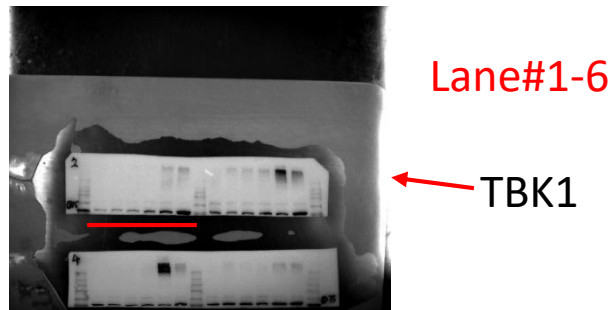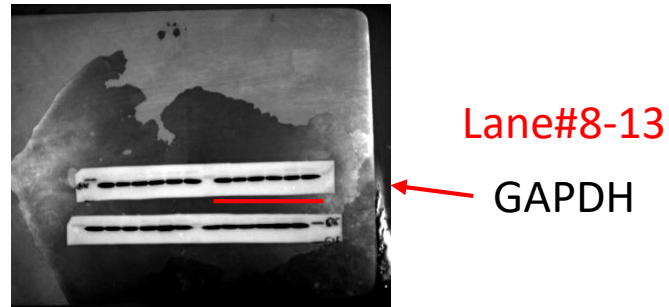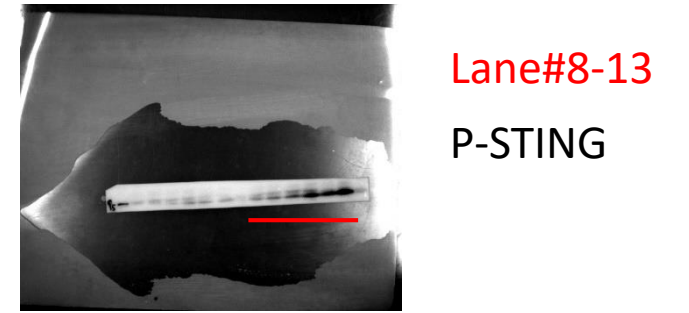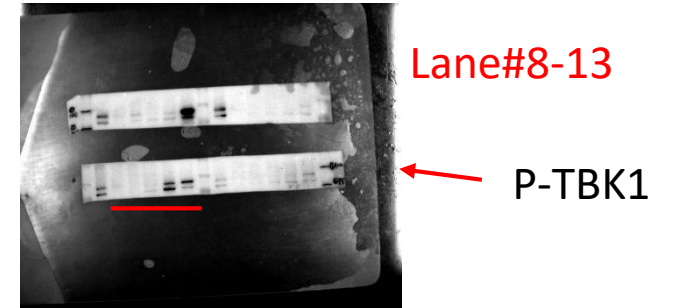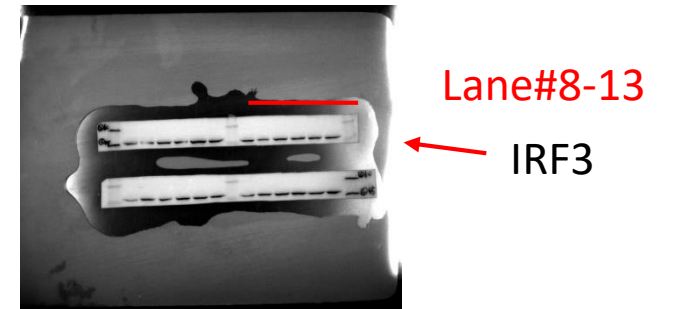

# Fig.1F

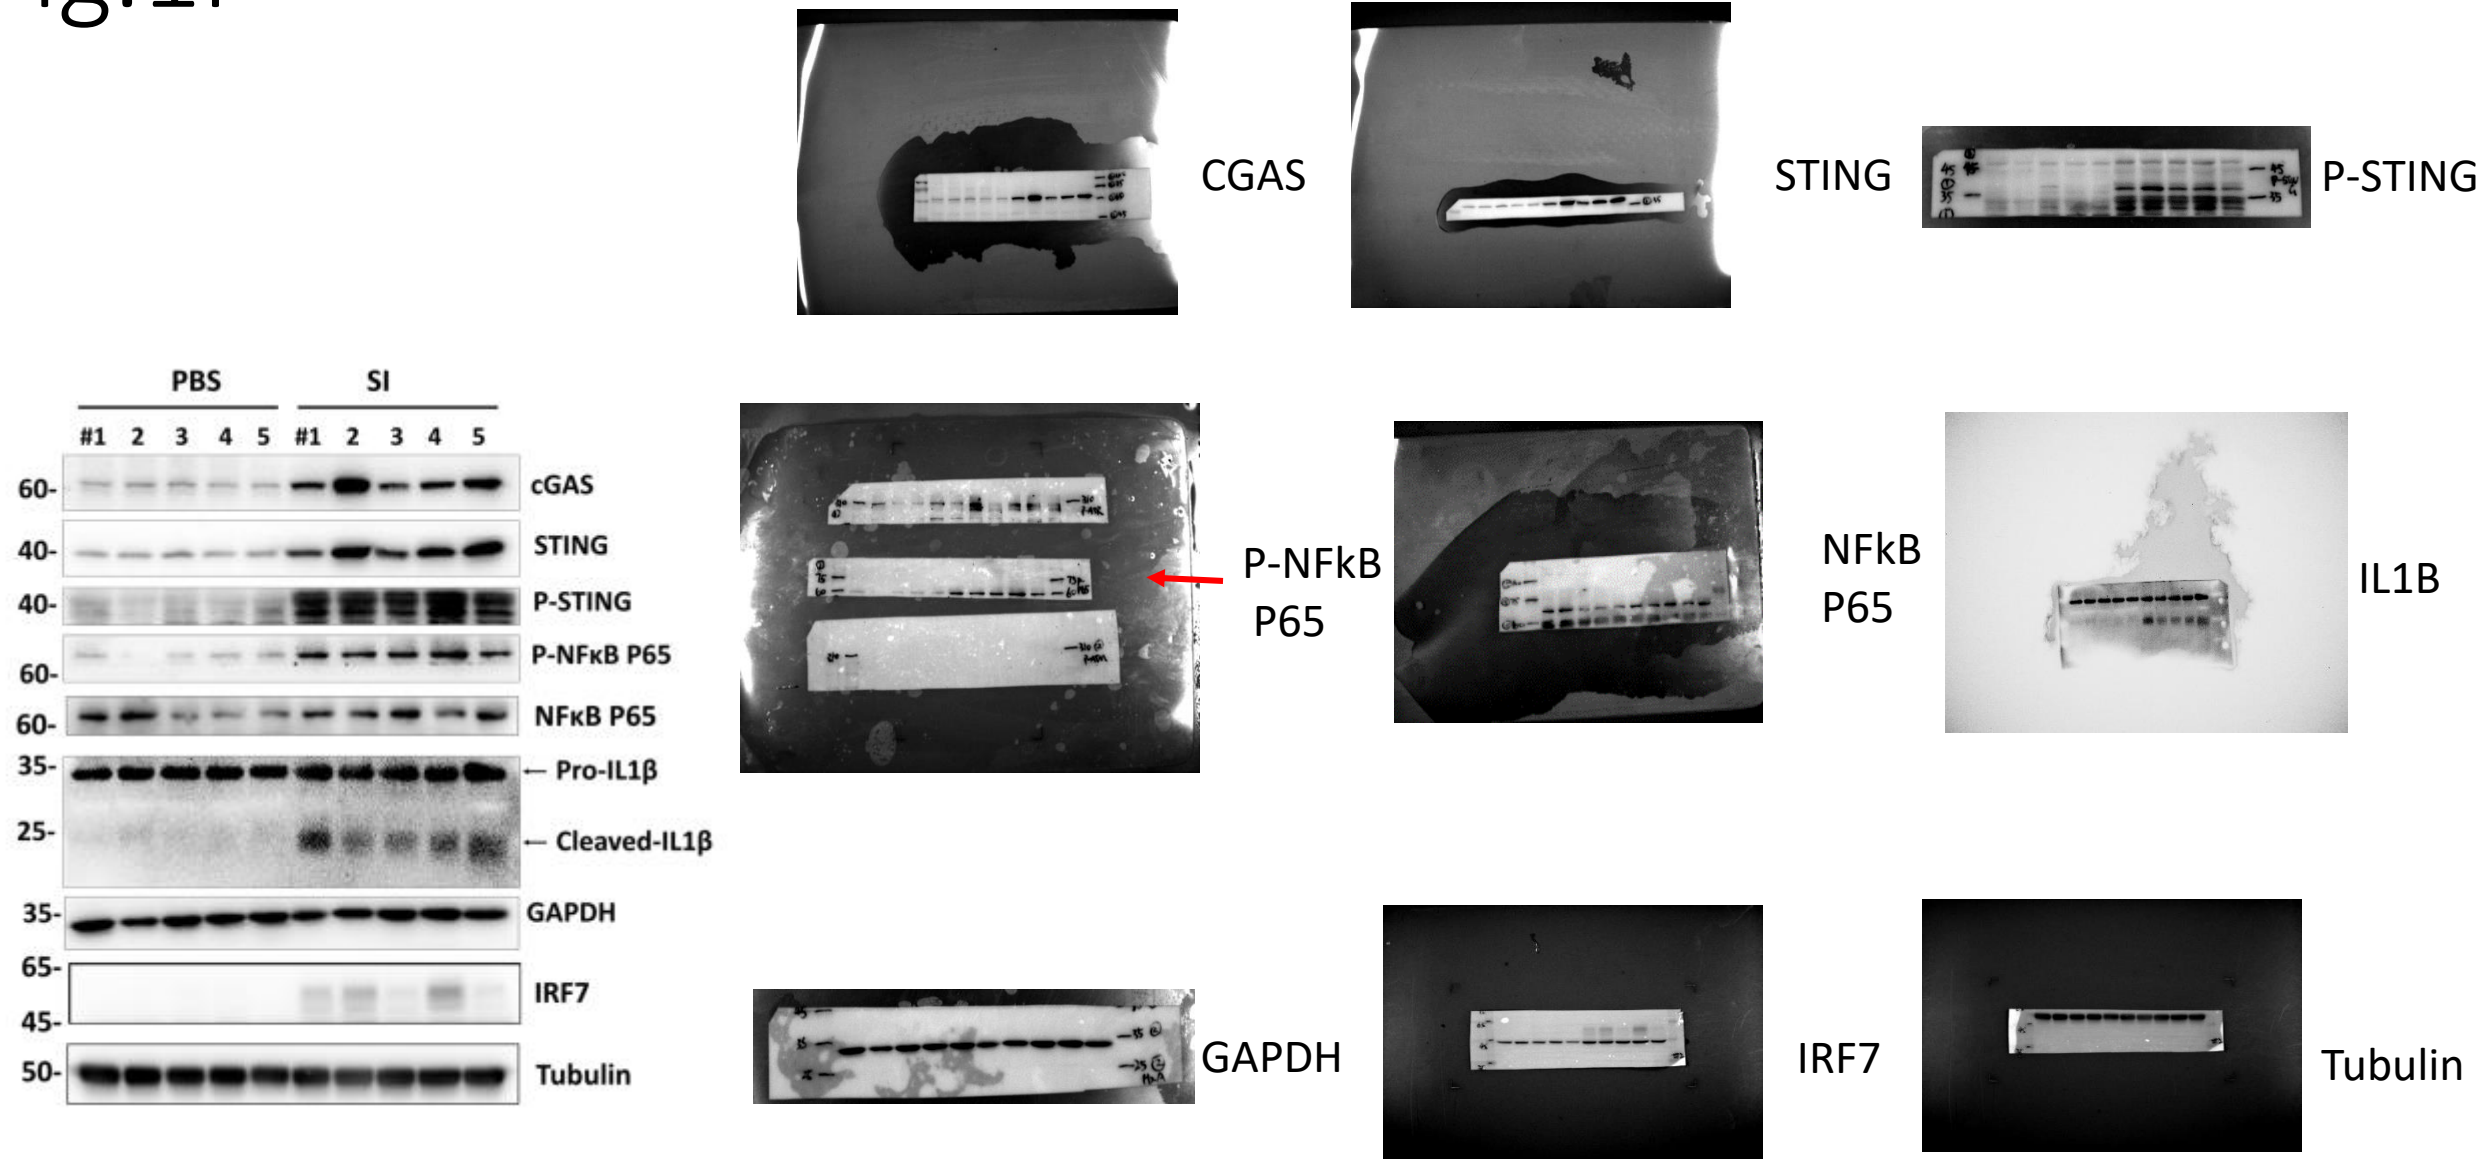

# Fig.1G

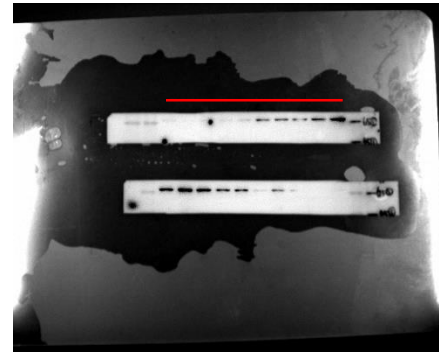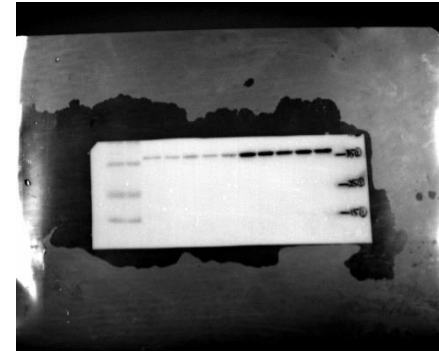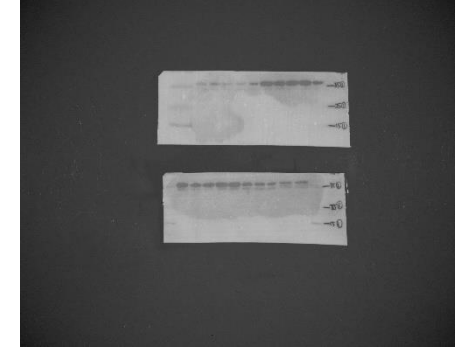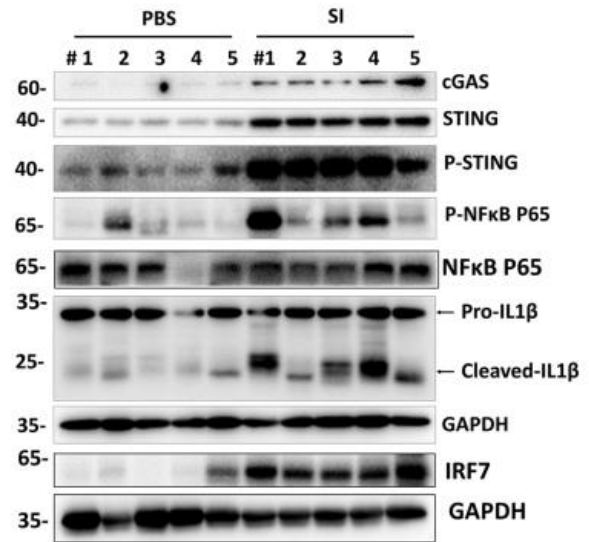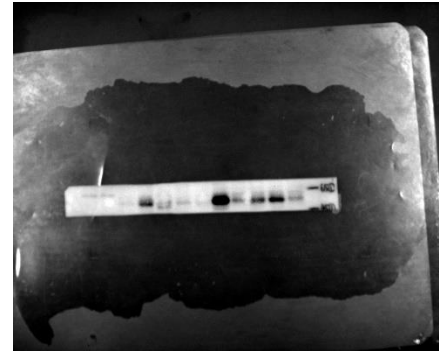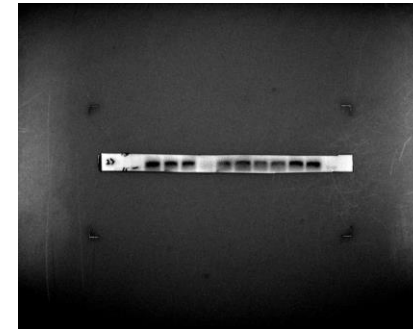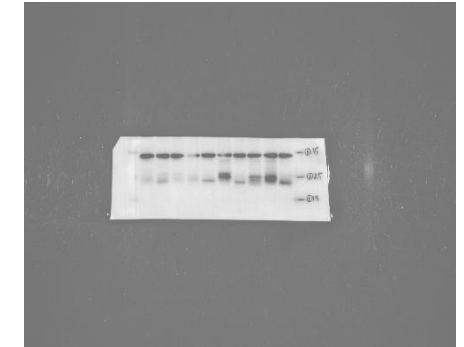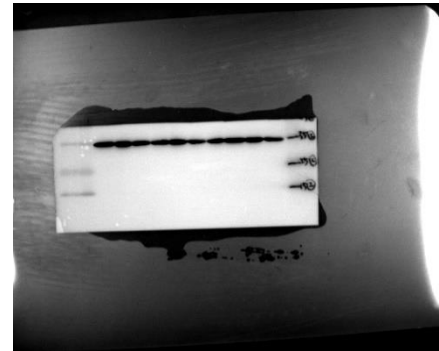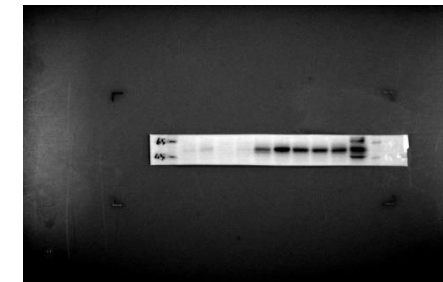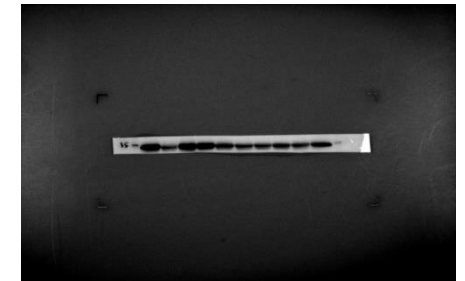

Fig.1 I

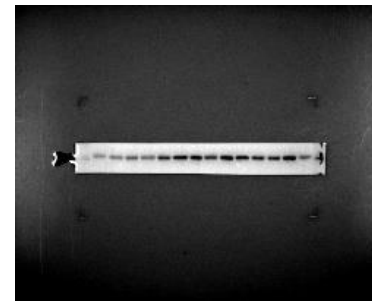

STING

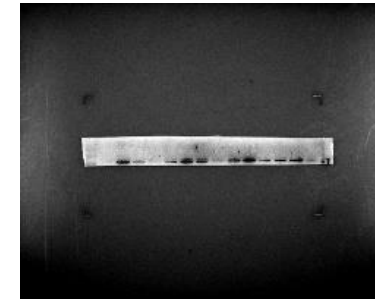

TBK1

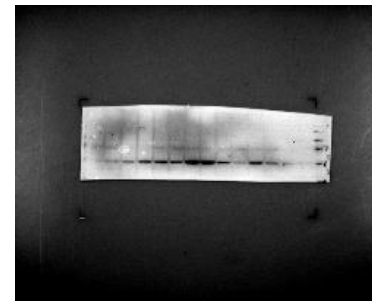

cGAS

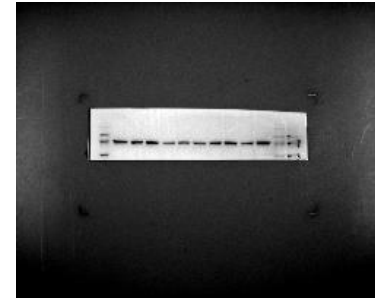

P-TBK1

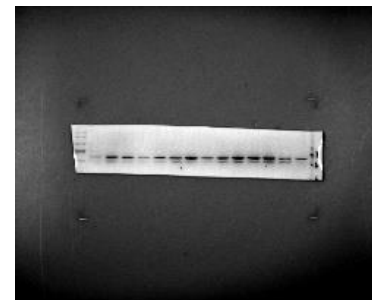

P-NFκb  
P65

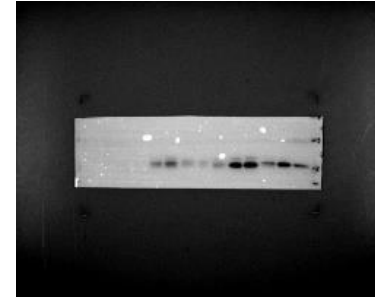

IL1β

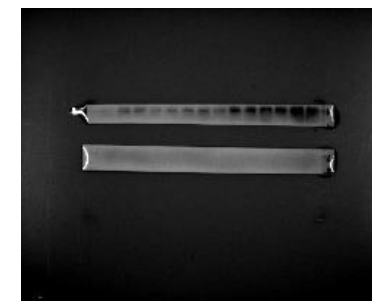

P65

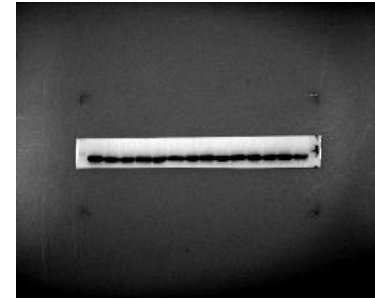

GAPDH

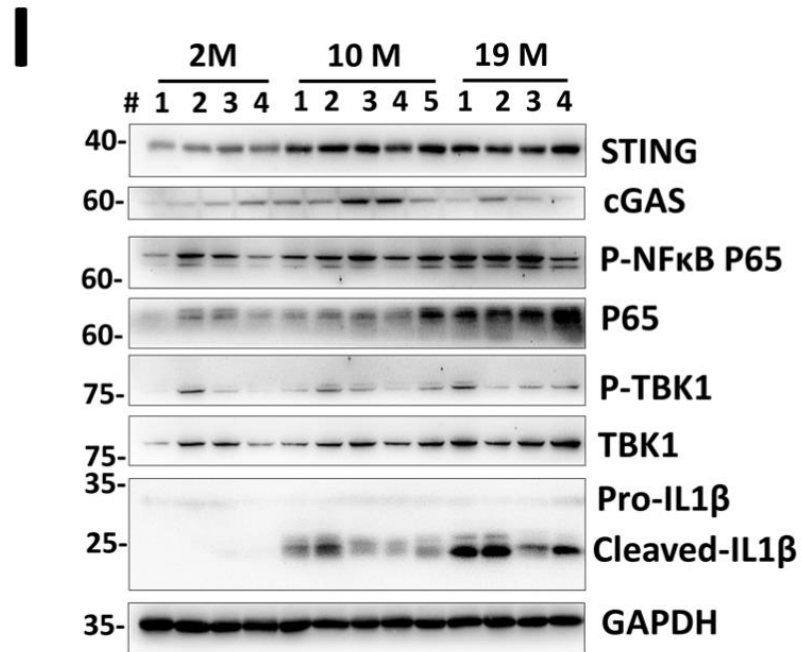

# Fig.2C

## C

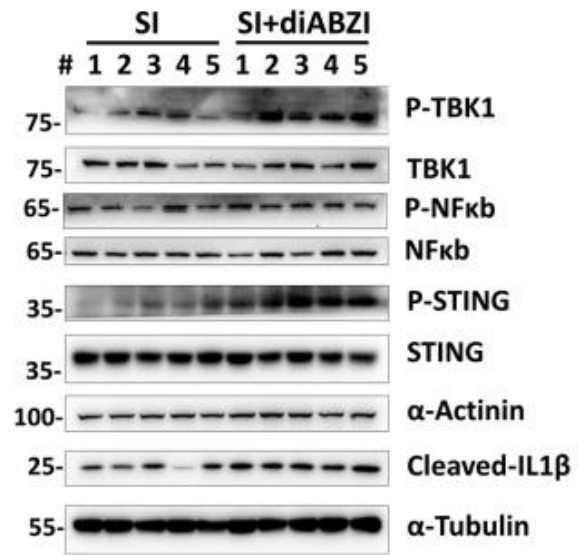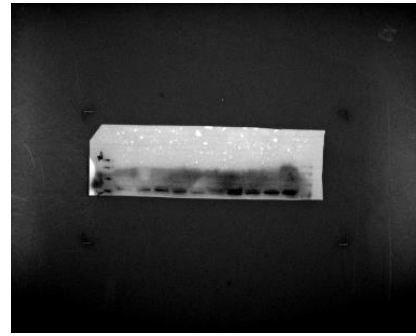

P-TBK1

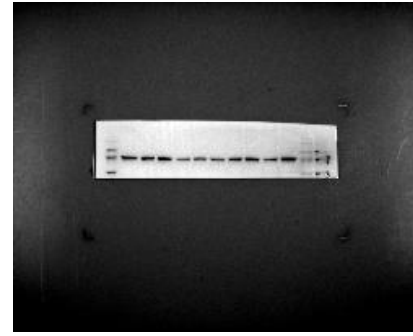

TBK1

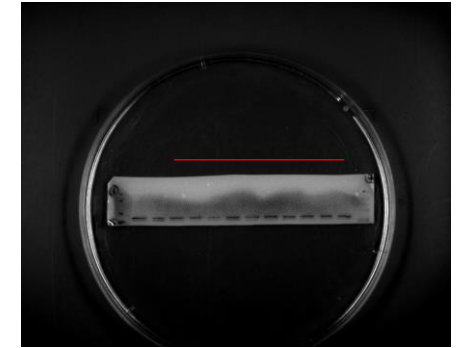

Lane#2-11  
P-NFkb

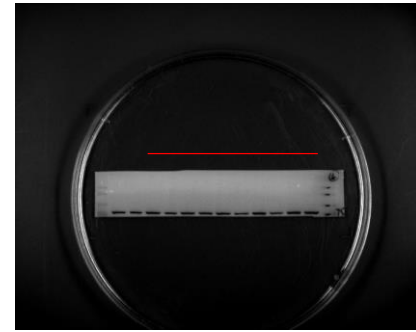

Lane#2-11  
NFkb

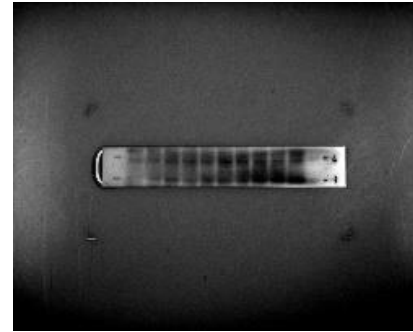

P-STING

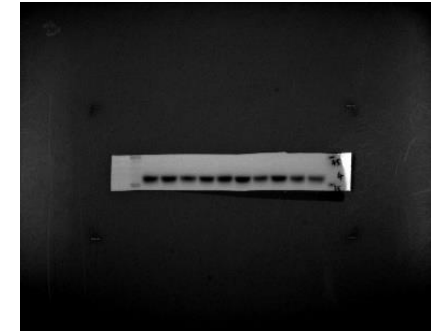

STING

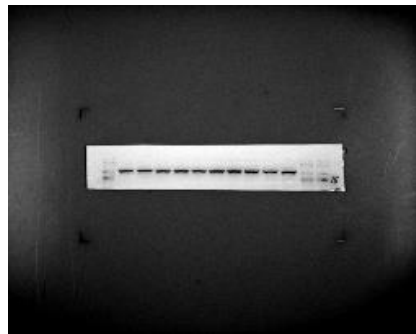

$\alpha$ -Actinin

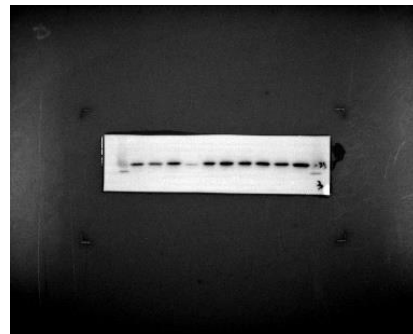

IL1 $\beta$

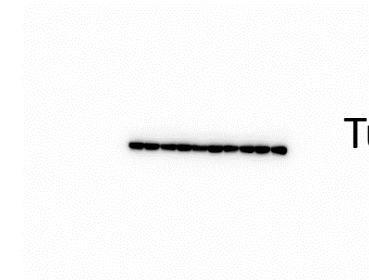

Tubulin



Fig.2J

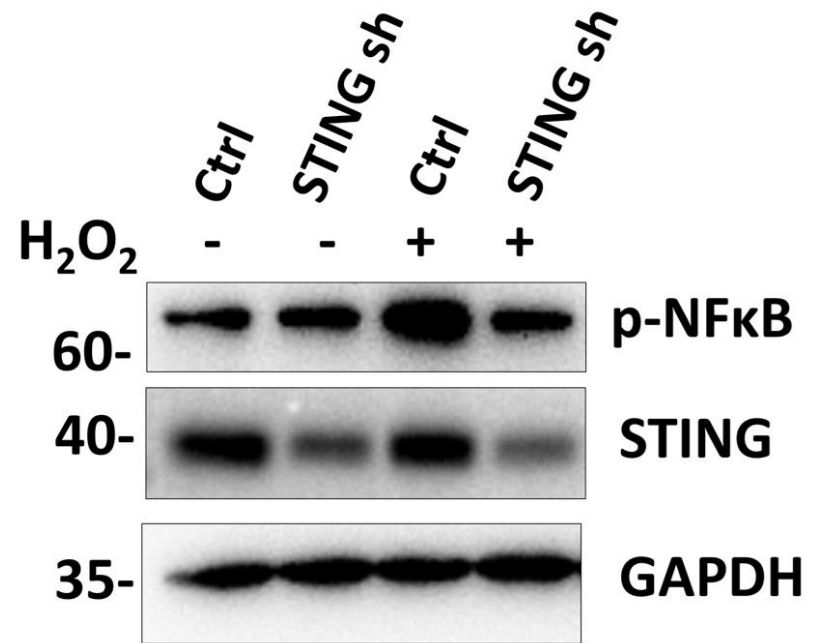

Lane#1-4

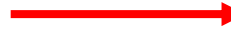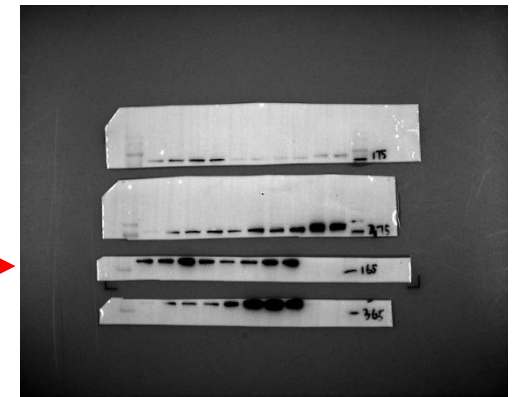

P-NFkB

Lane#1-4

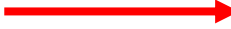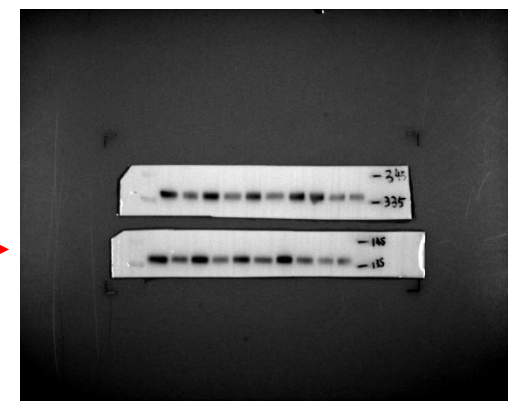

STING

Lane#1-4

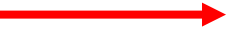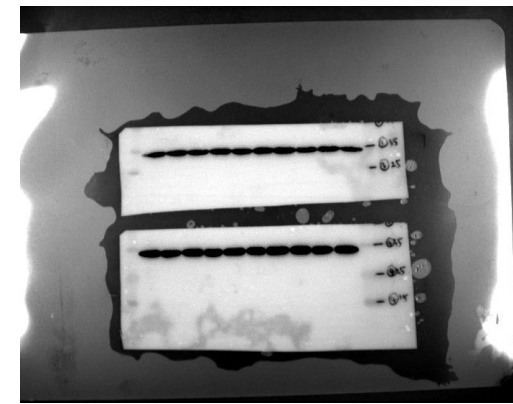

GAPDH

Fig.3D

D

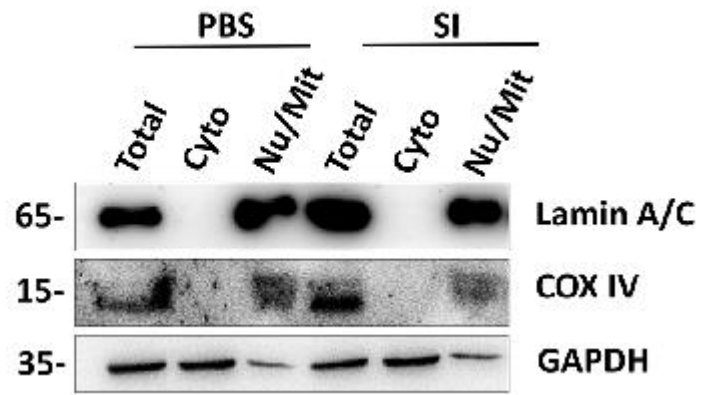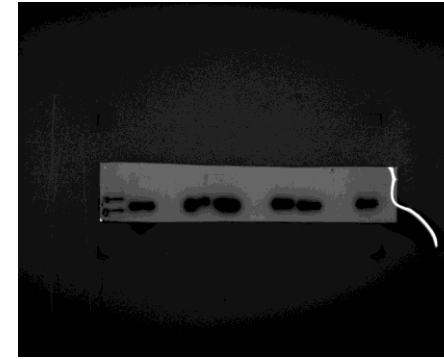

Lamin A/C

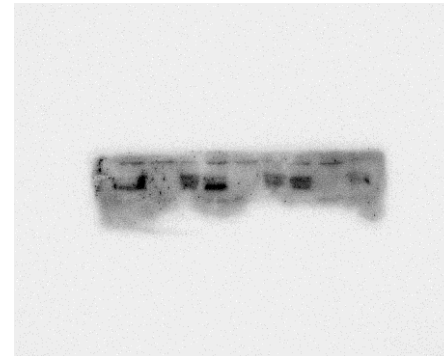

Long exposure

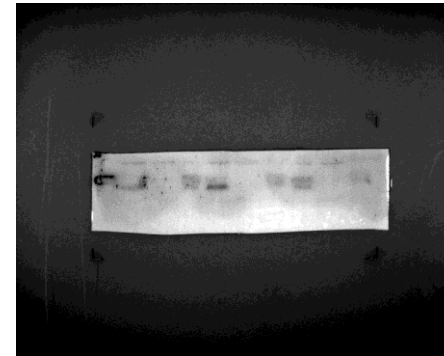

Short exposure

COX IV

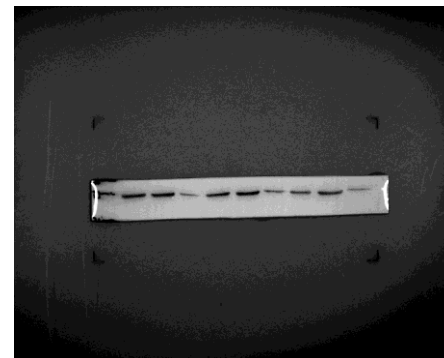

GAPDH



Fig.3H

H

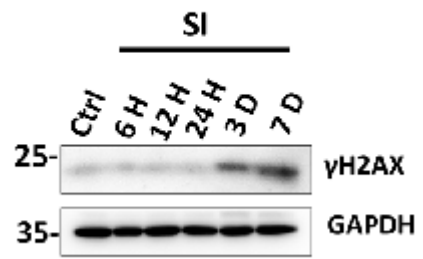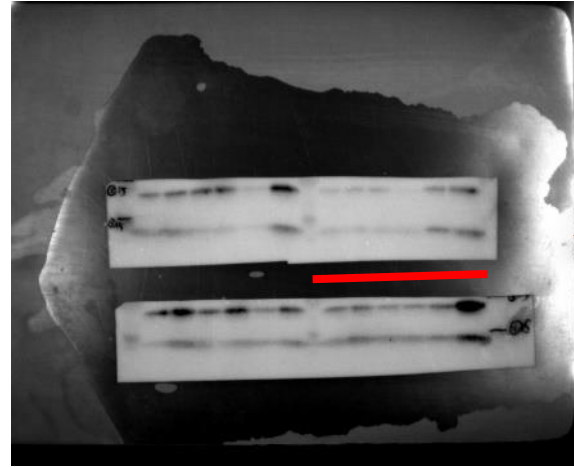

$\gamma$ -H2AX

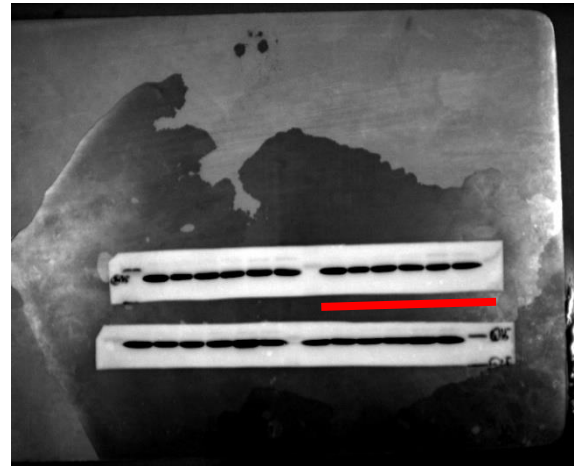

GAPDH

# Fig.3I

I

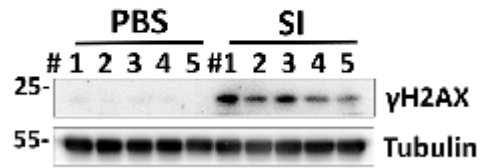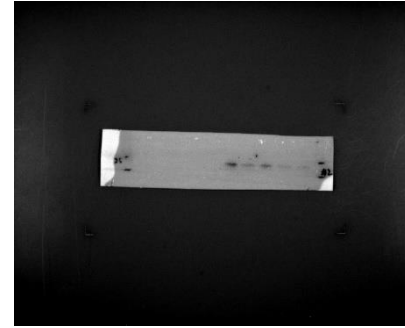

$\gamma$ H2AX

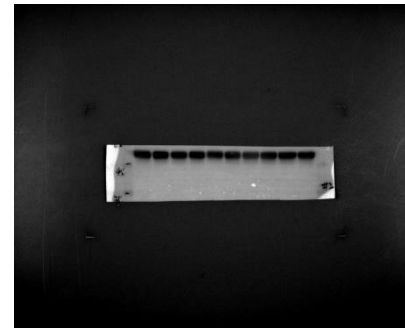

$\beta$ -tubulin

Fig.3 J

J

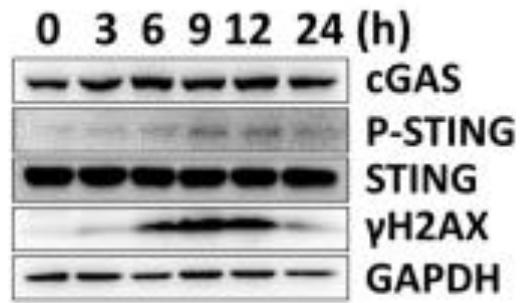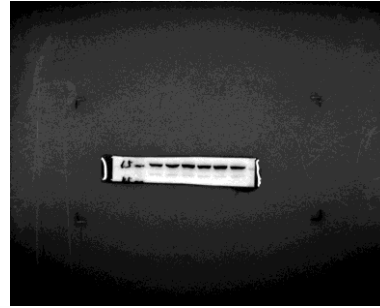

CGAS

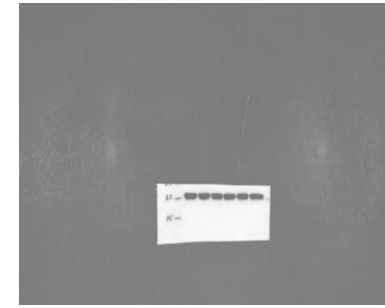

STING

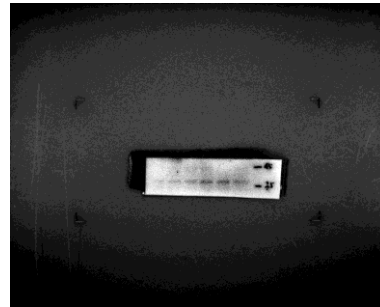

P-STING

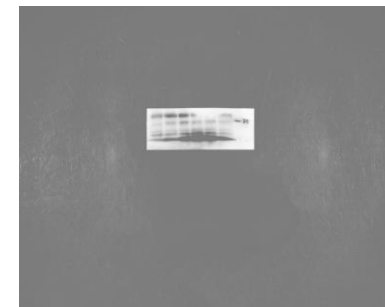

rH2AX

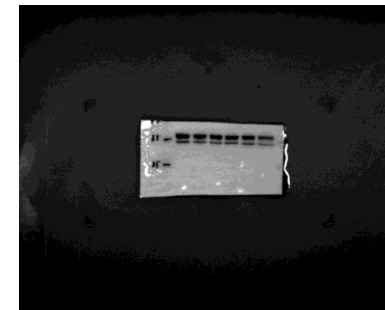

GAPDH

# Fig.3M

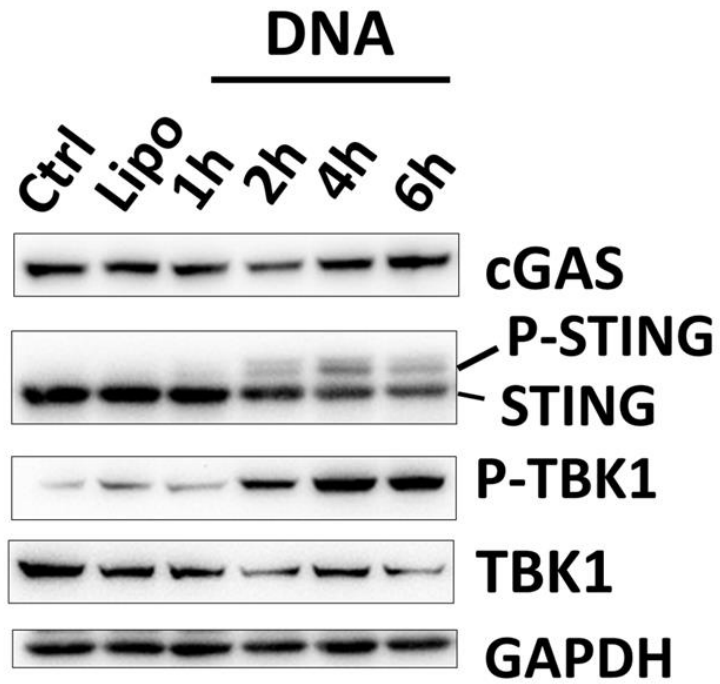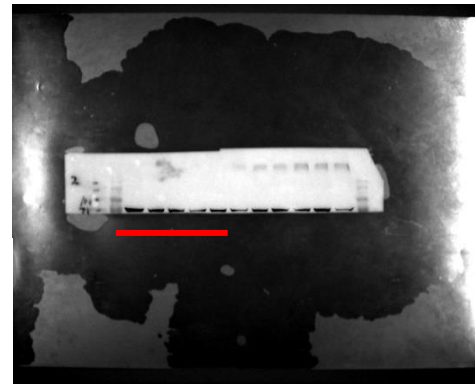

**Lane#1-6**  
**TBK1**

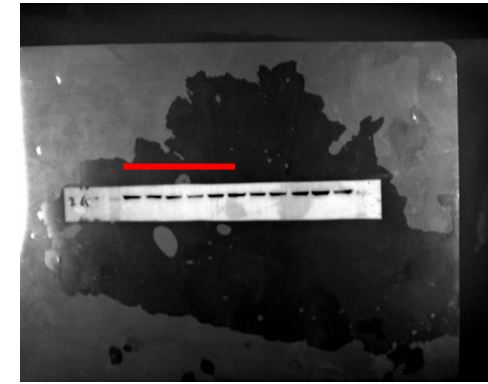

**Lane#1-6**  
**cGAS**

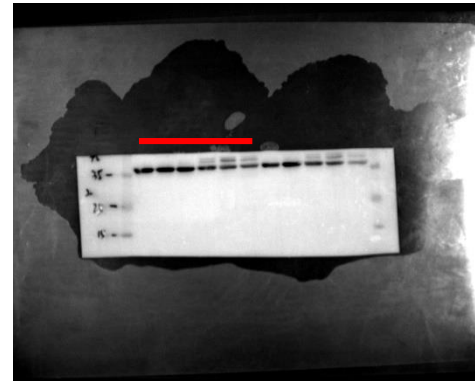

**Lane#1-6**  
**P-STING**  
**&STING**

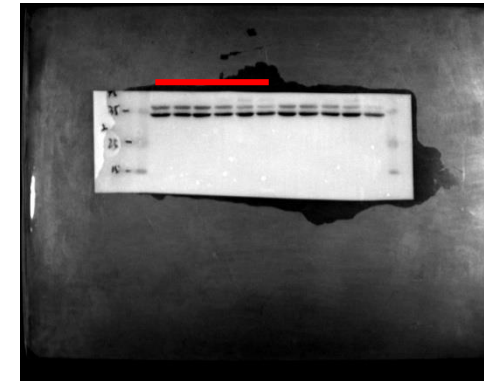

**Lane#1-6**  
**GAPDH**

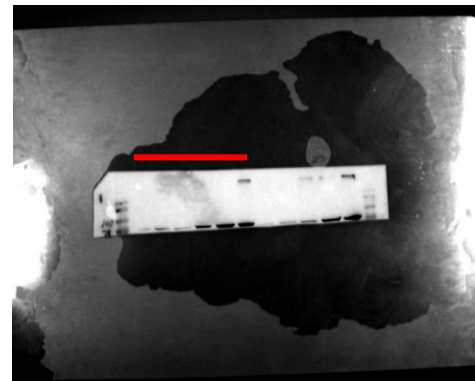

**Lane#1-6**  
**P-TBK1**

Fig.3 N

**N**

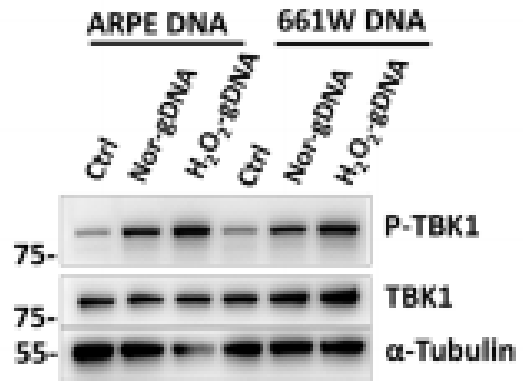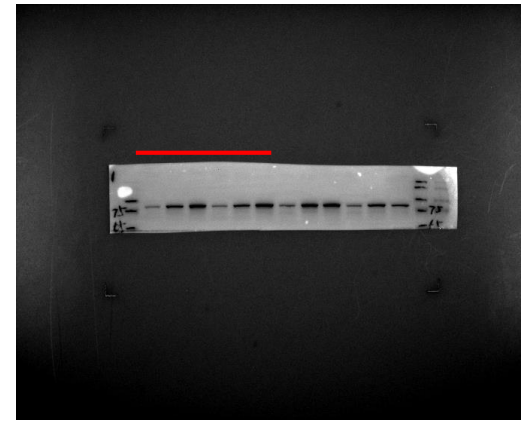

Lane #1-6

P-TBK1

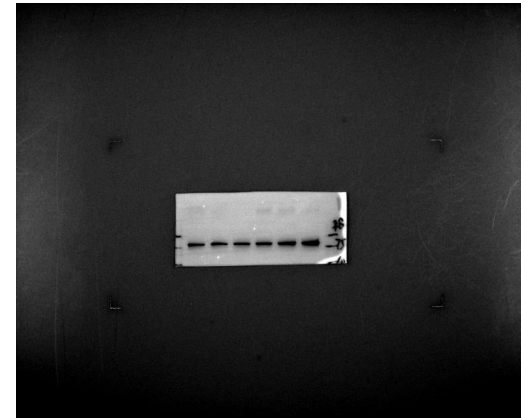

TBK1

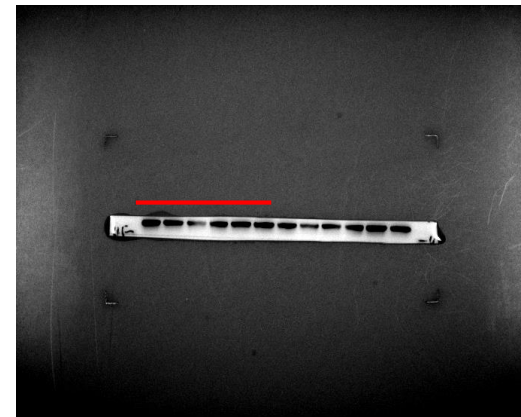

Lane #1-6

α-Tubulin

Fig.4C

C

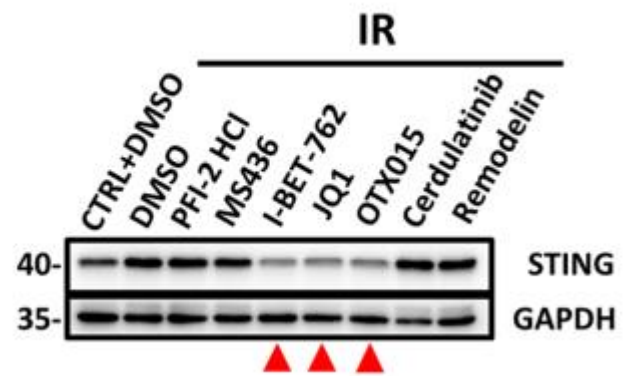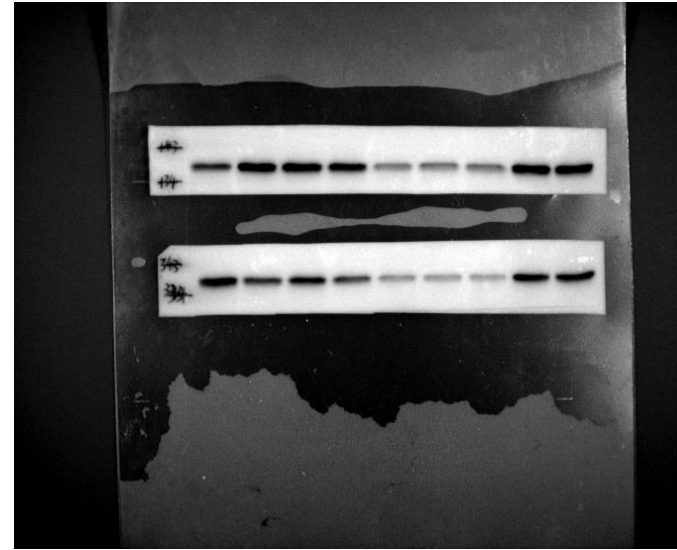

← STING

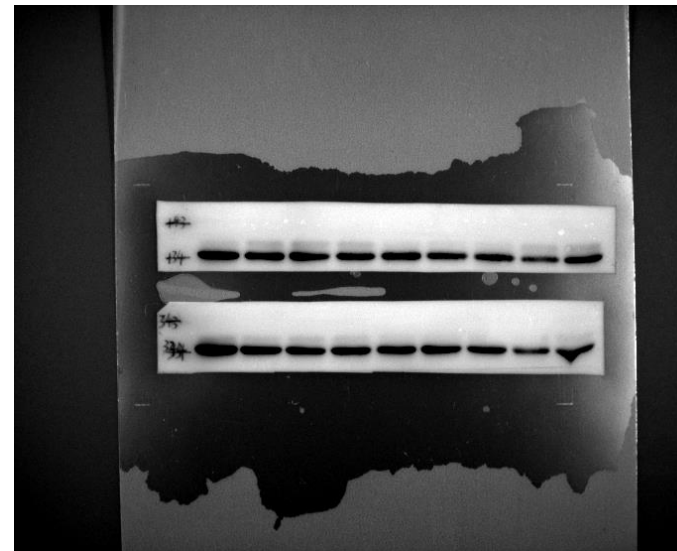

← GAPDH

Fig.4E

E

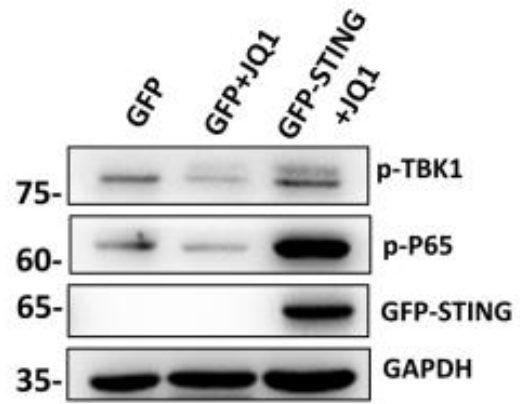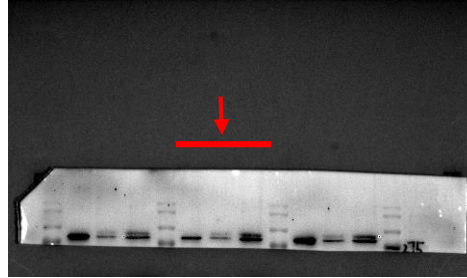

P-TBK1

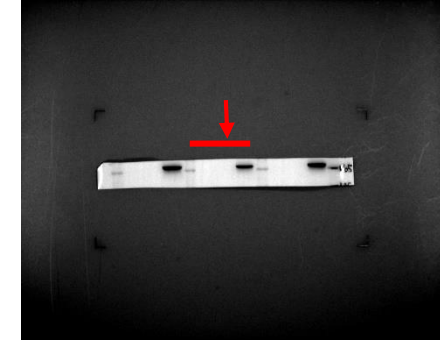

GFP-STING

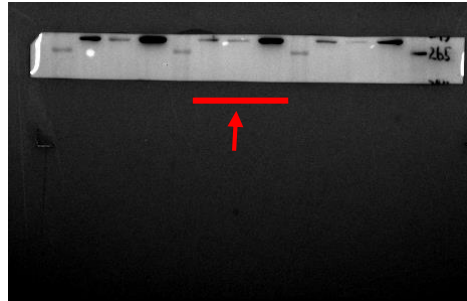

P-P65

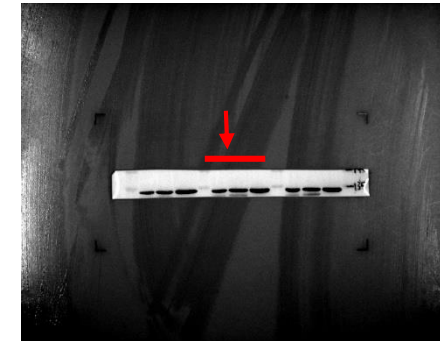

GAPDH

Fig.5F

F

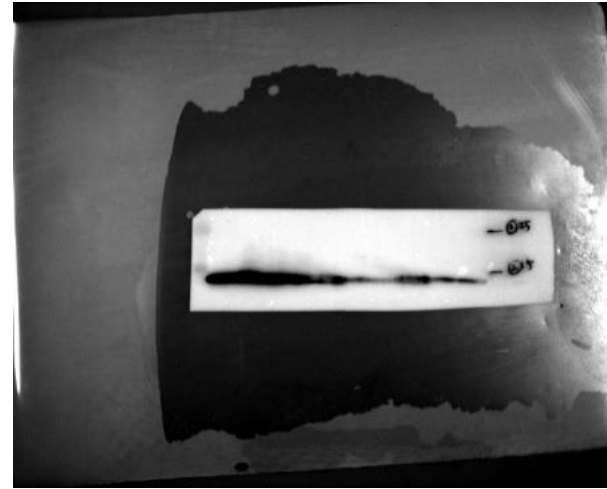

H3K9Ac

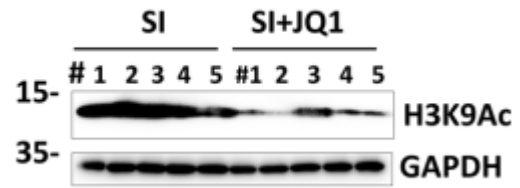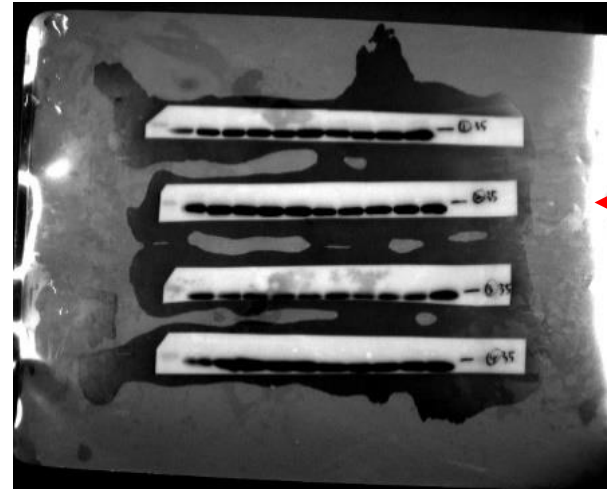

GAPDH



Fig.6B

**B**

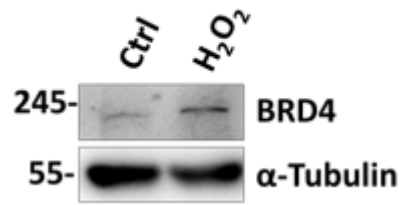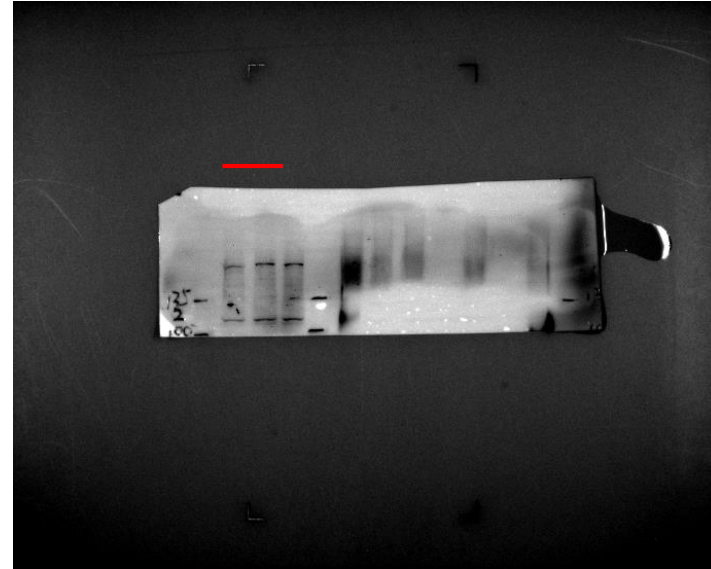

Lane#1-2

BRD4

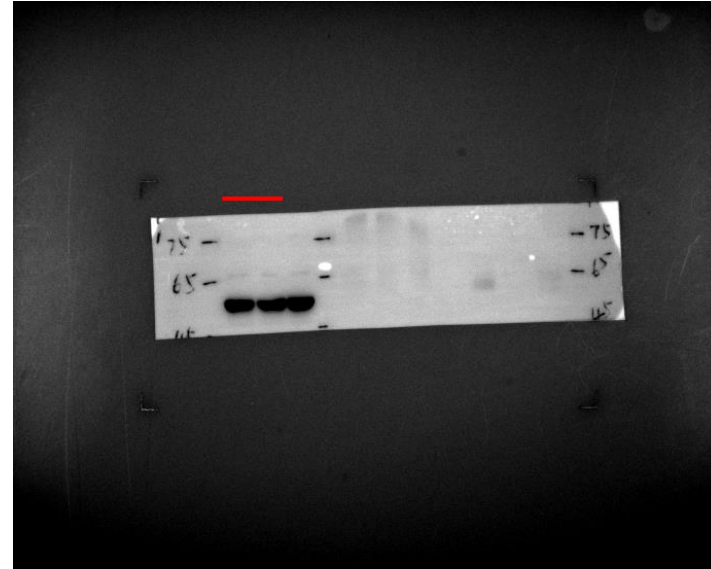

Lane#1-2

alpha-Tubulin

Fig.6C

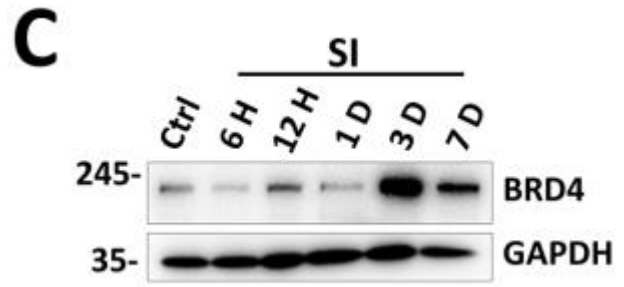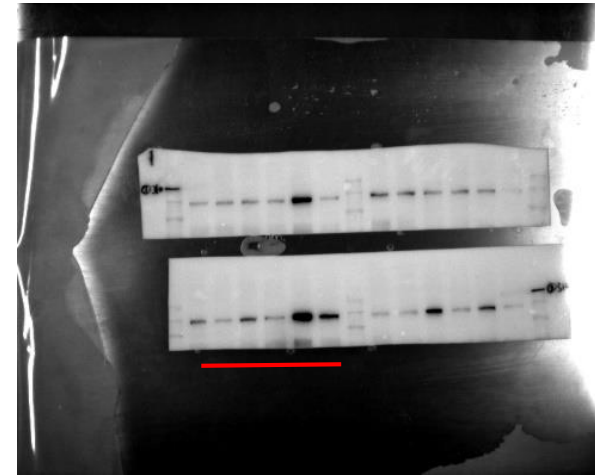

Lane#1-6

BRD4

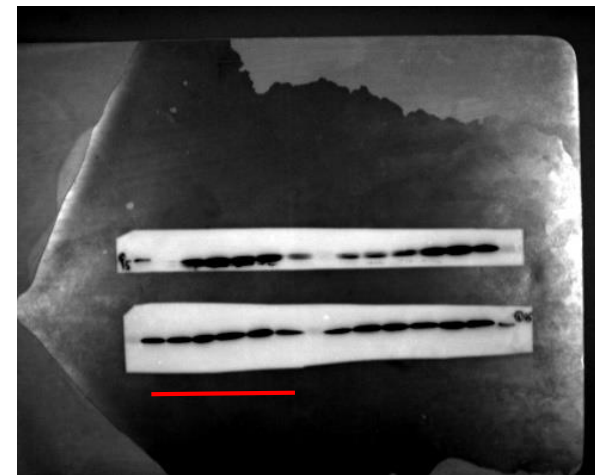

Lane#1-6

GAPDH

Fig.6D

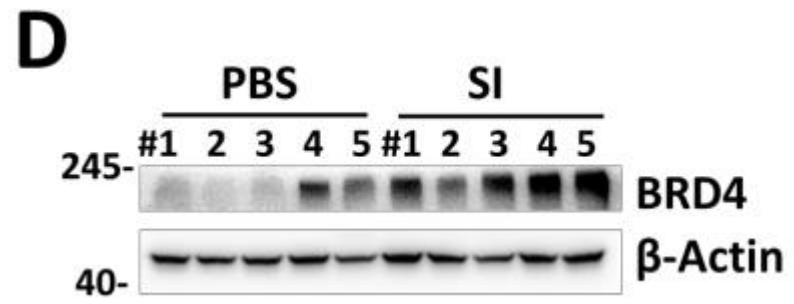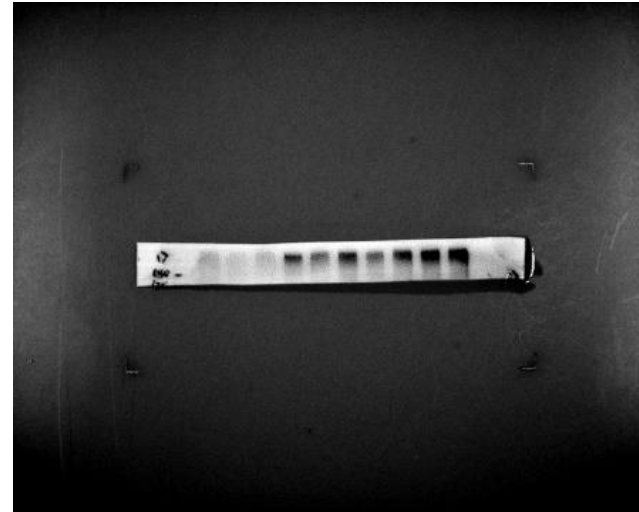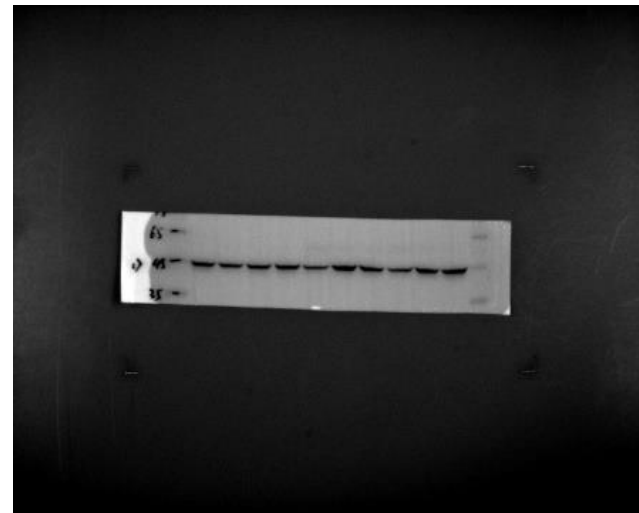

Fig.6 F

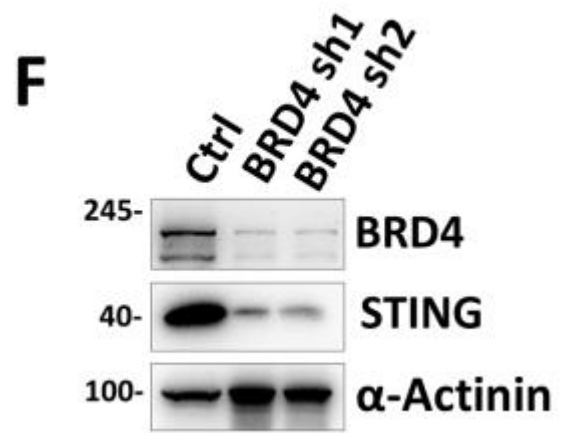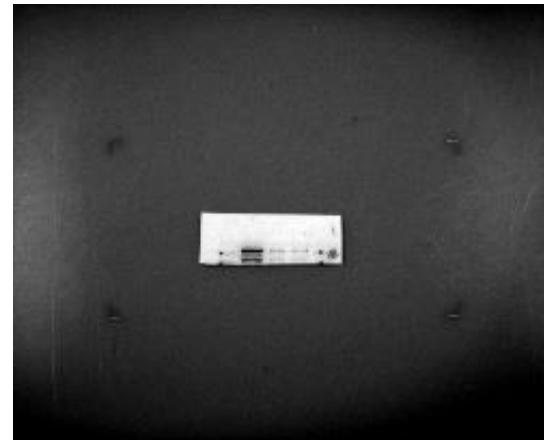

BRD4

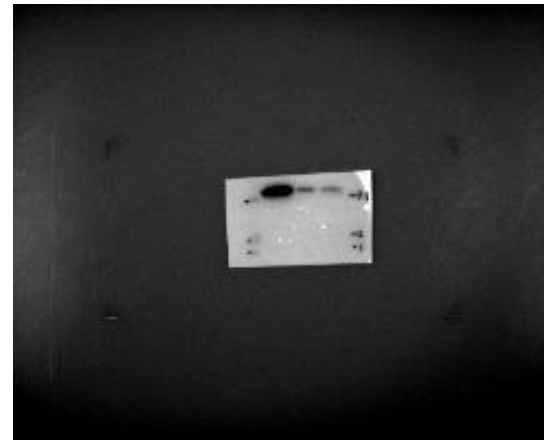

STING

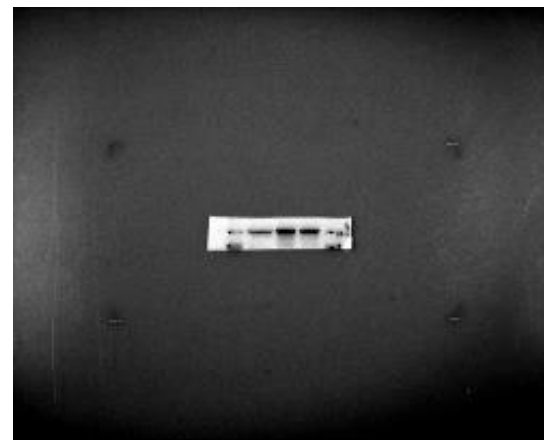

$\alpha$ -Actinin

# Fig.7A

## A

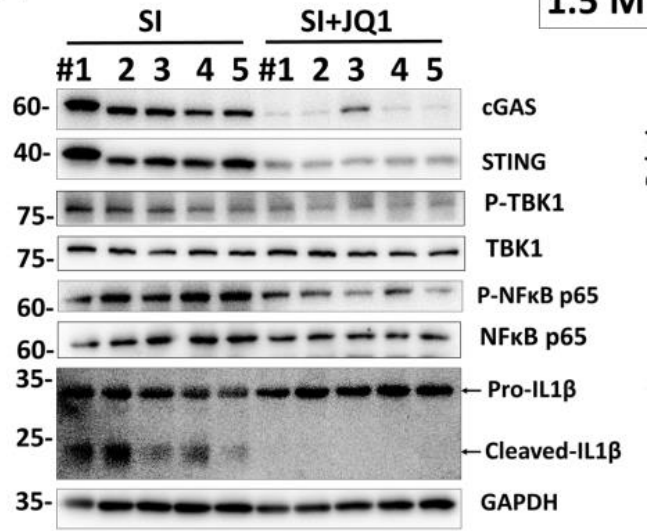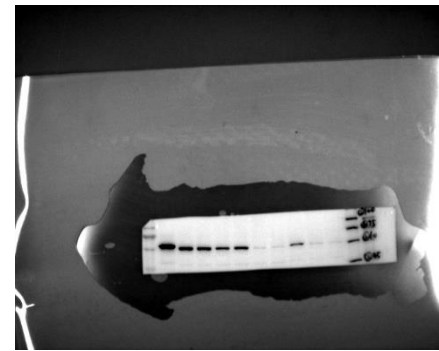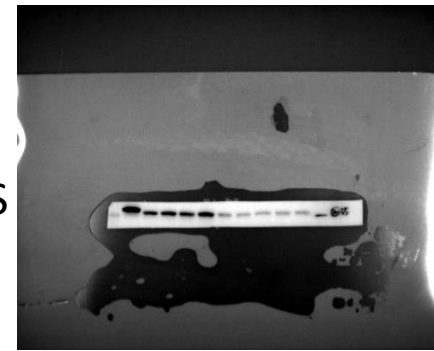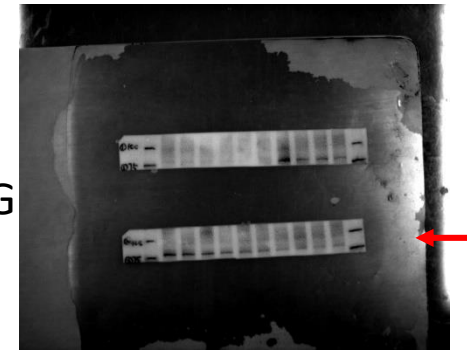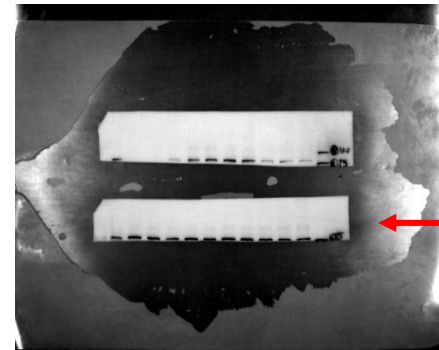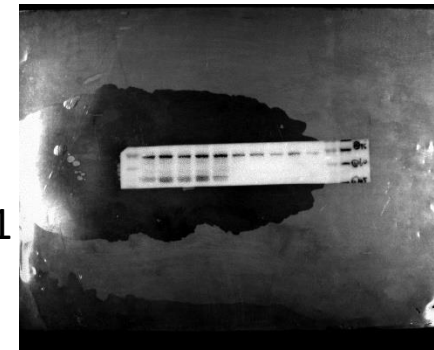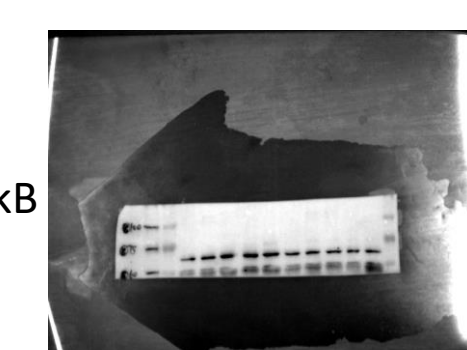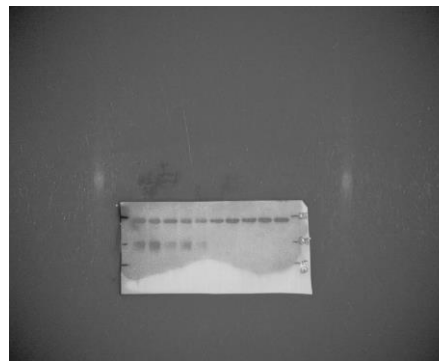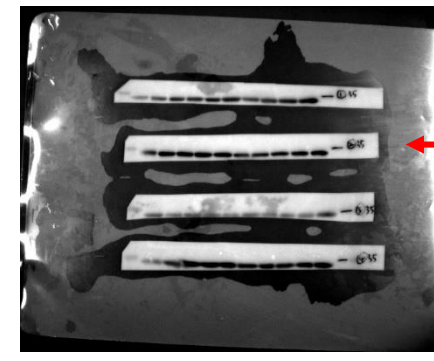

# Fig.7B

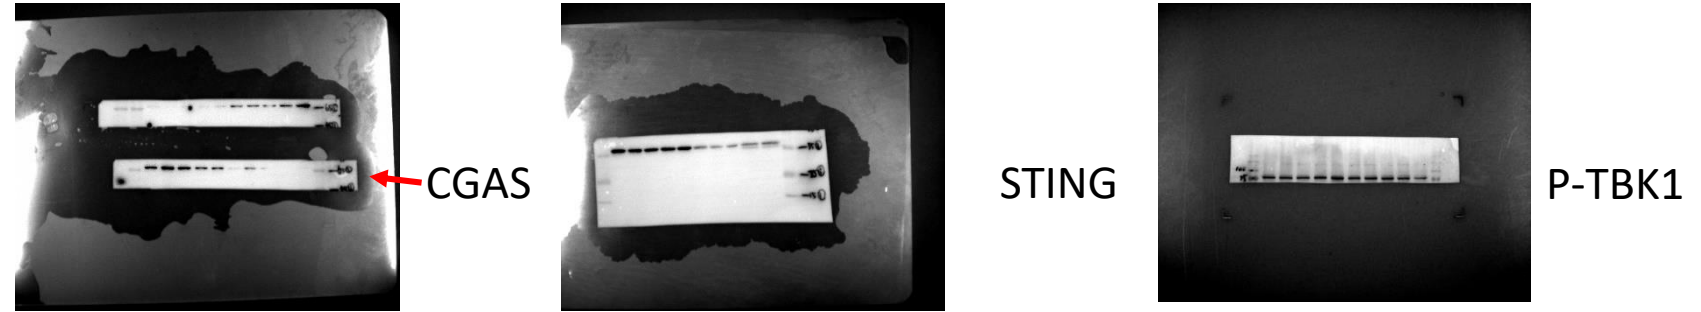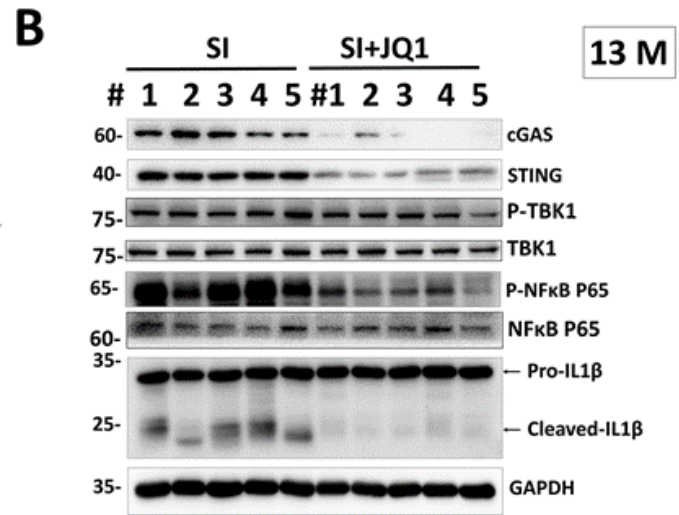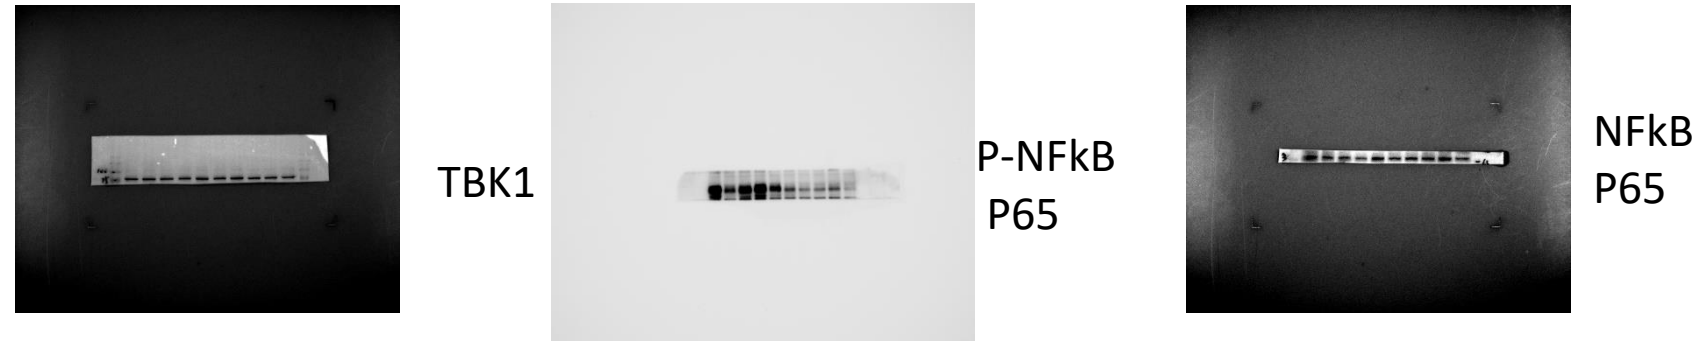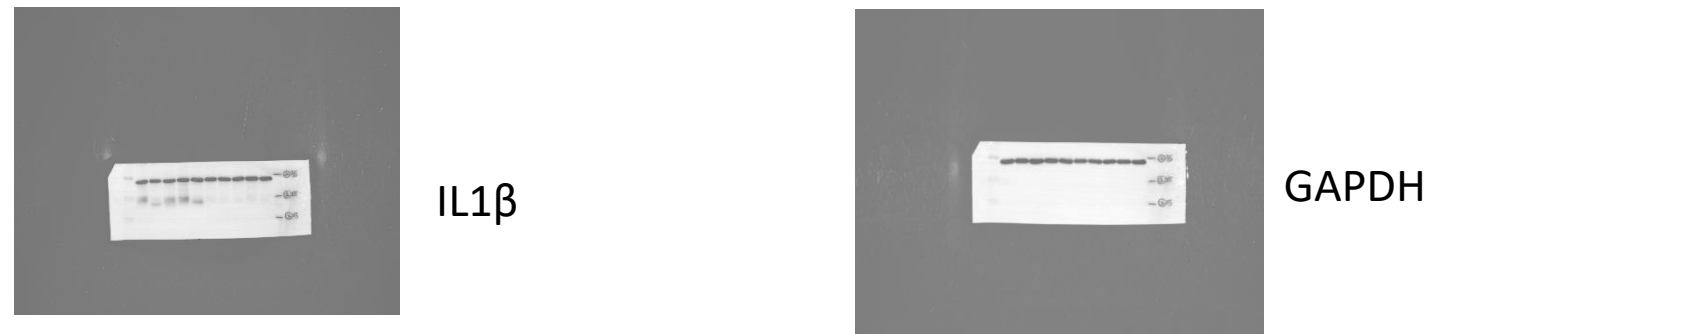

Fig.7D

D

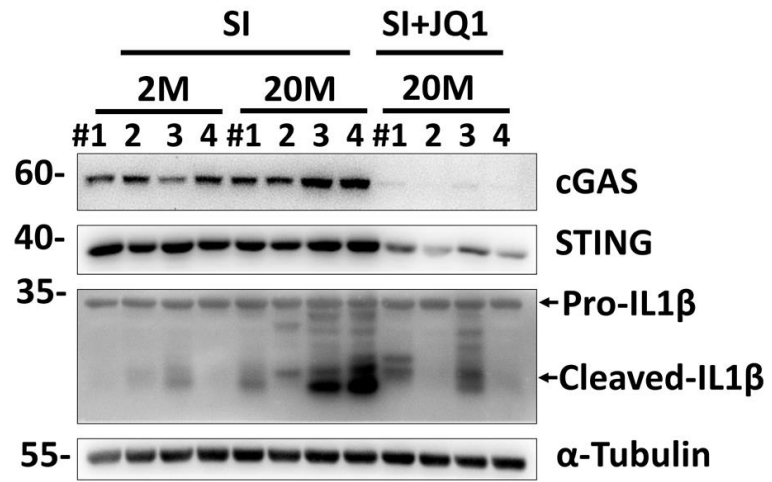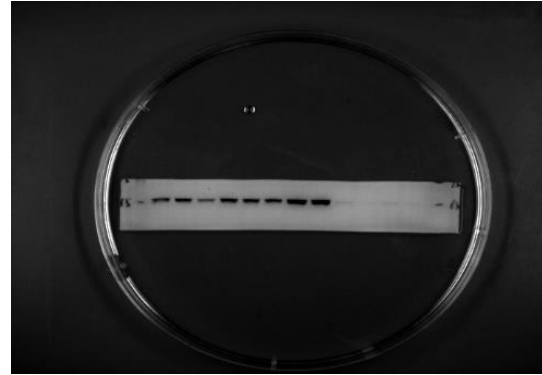

cGAS

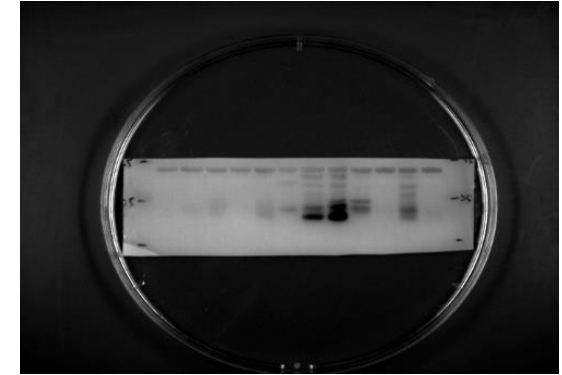

IL1β

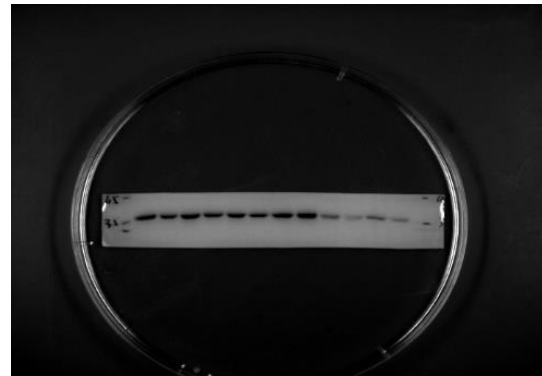

STING

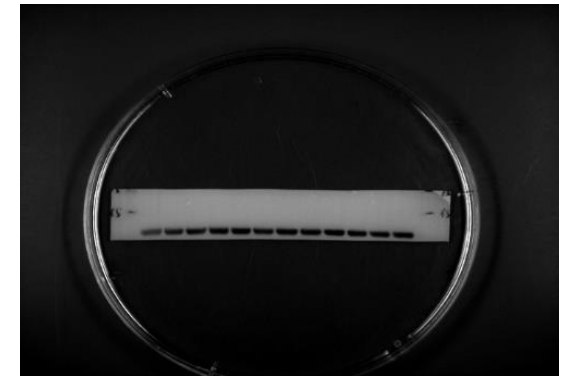

α-Tubulin

# Fig.8B

## B

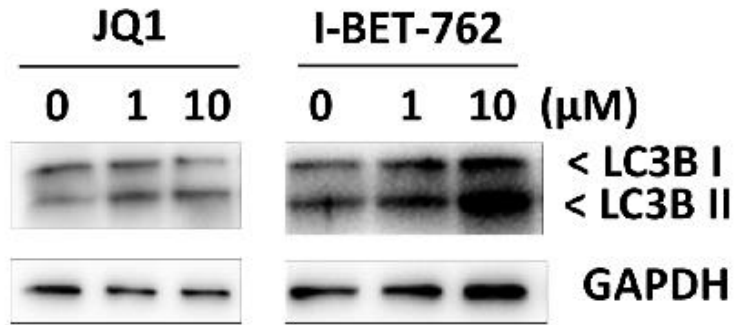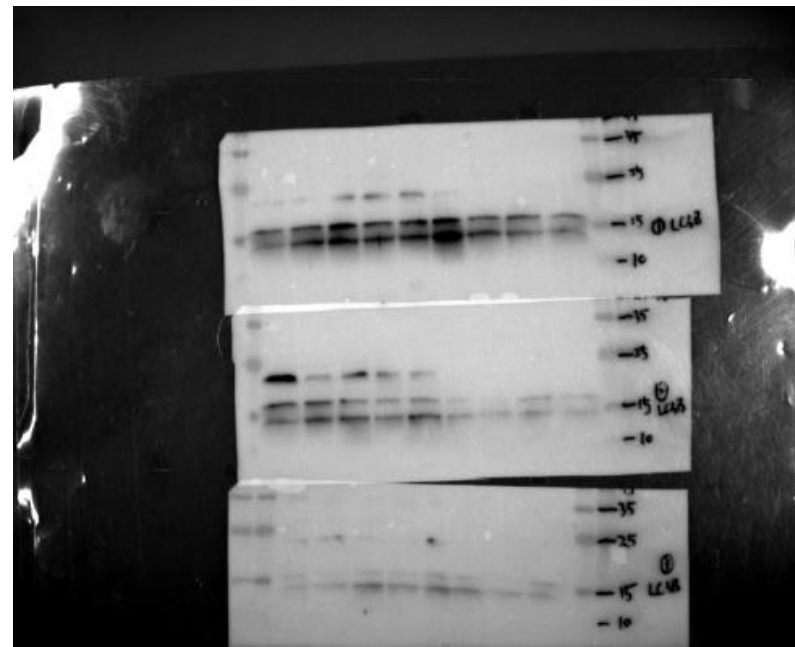

← Lane#4-6(I-BET-762)

LC3B

← Lane#1-3(JQ1)

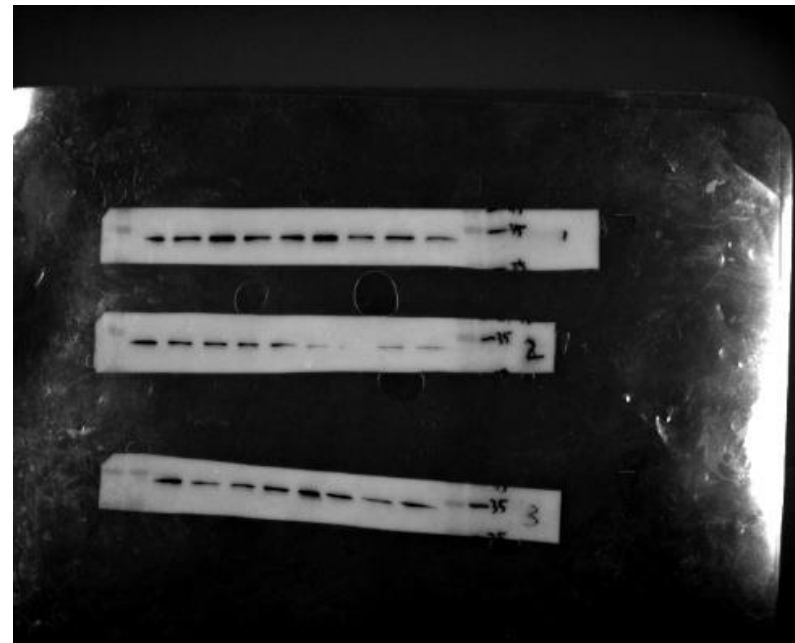

← Lane#4-6(I-BET-762)  
GAPDH

← Lane#1-3(JQ1)



Fig.8 C

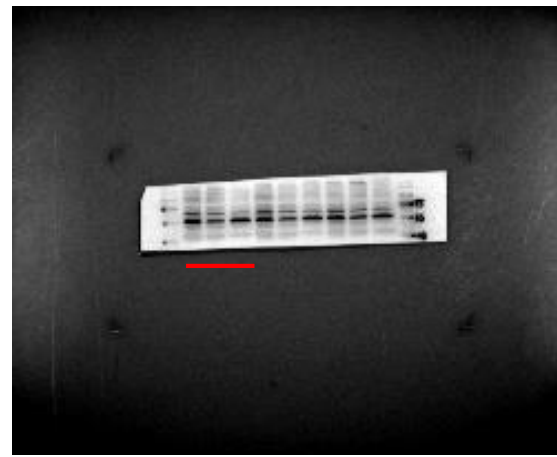

Lane#1-3

P62

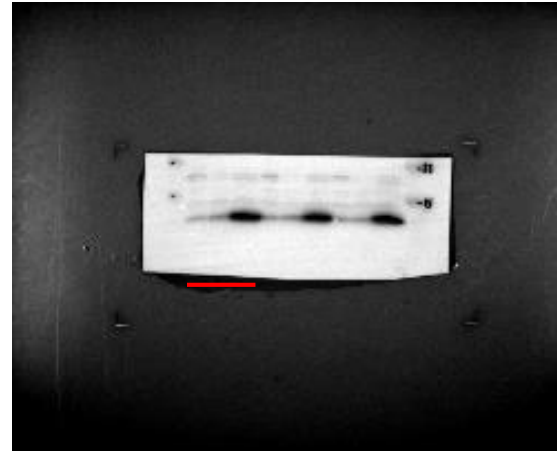

Lane#1-3

lc3b

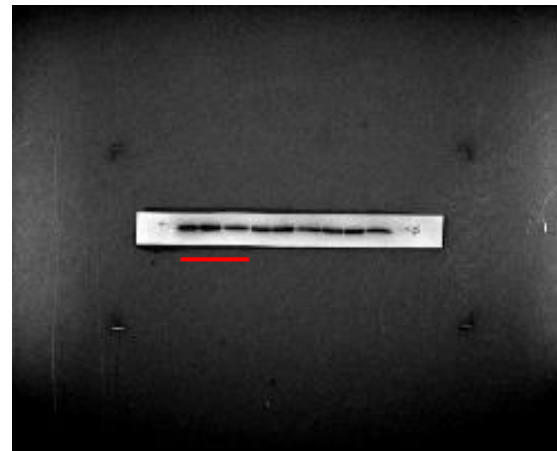

Lane#1-3

GAPDH

C

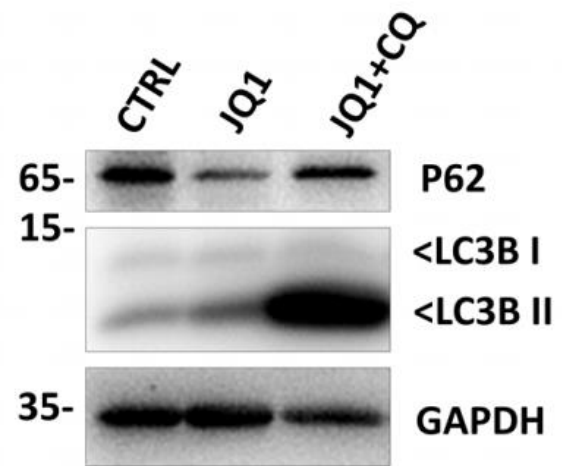

Fig.8D

**D**

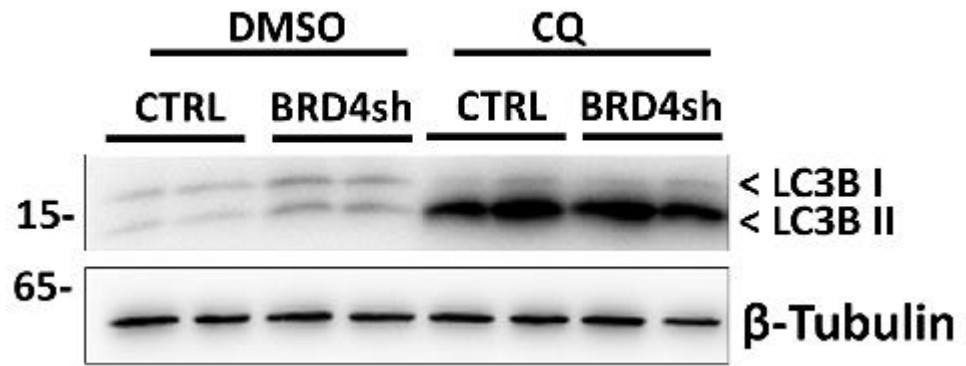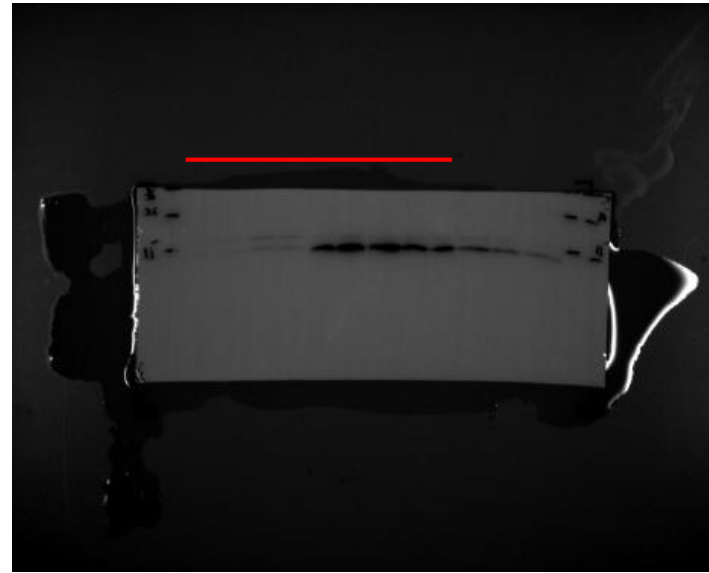

Lane#1-8

LC3B

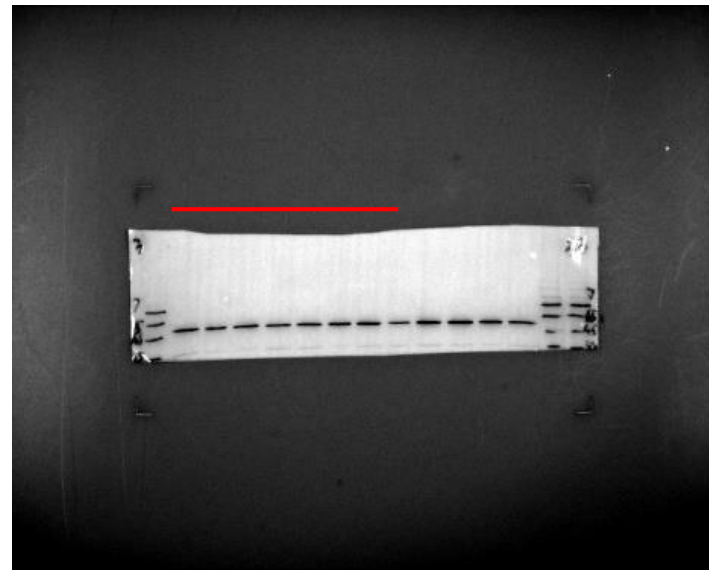

Lane#1-8

$\beta$ -Tubulin

# Fig.S1

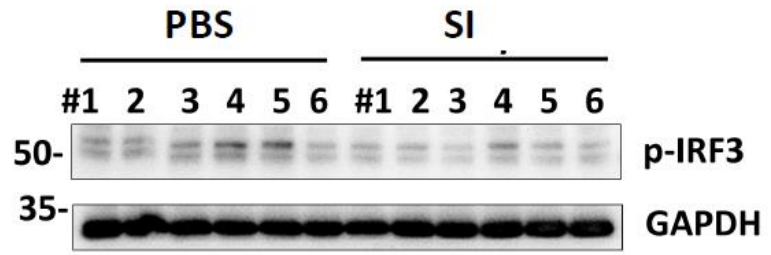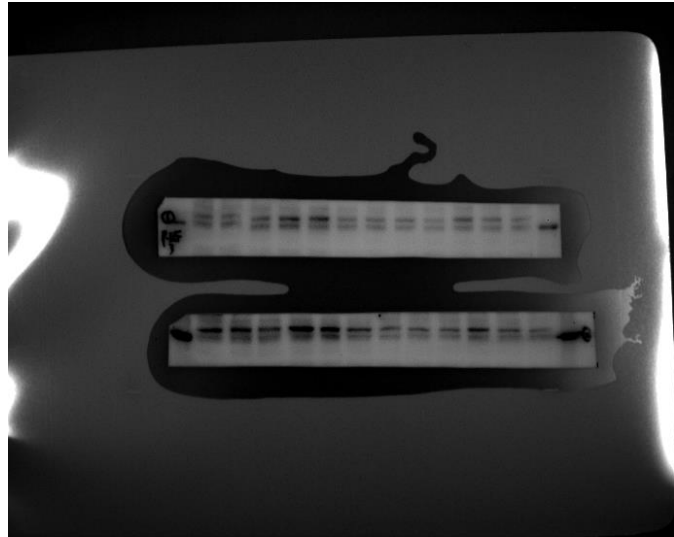

P-IRF3

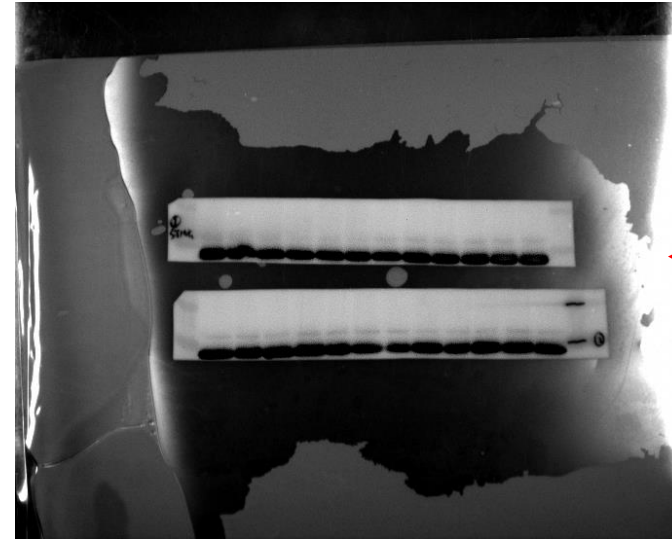

GAPDH

# Fig.S2

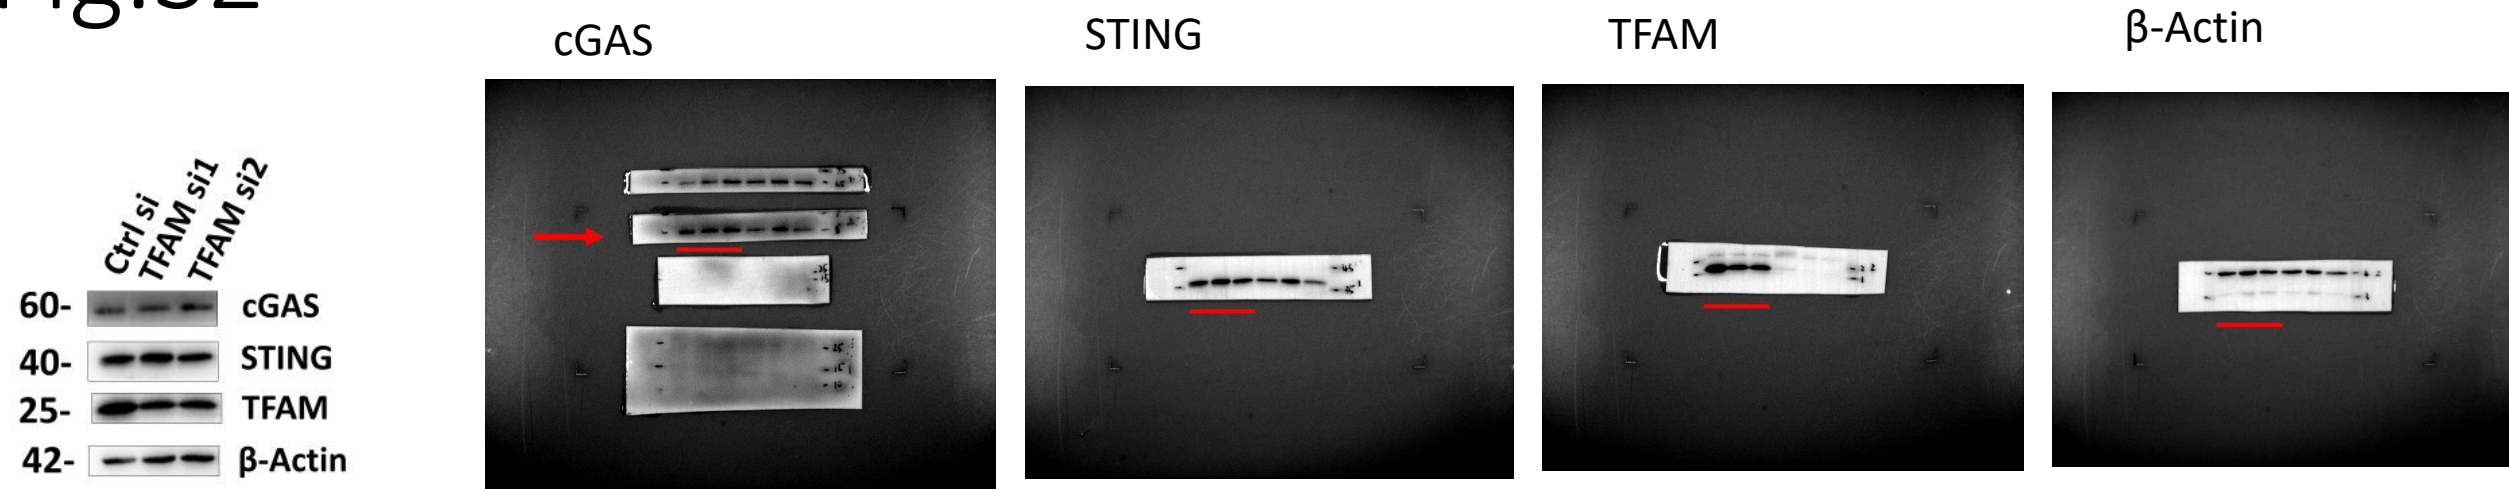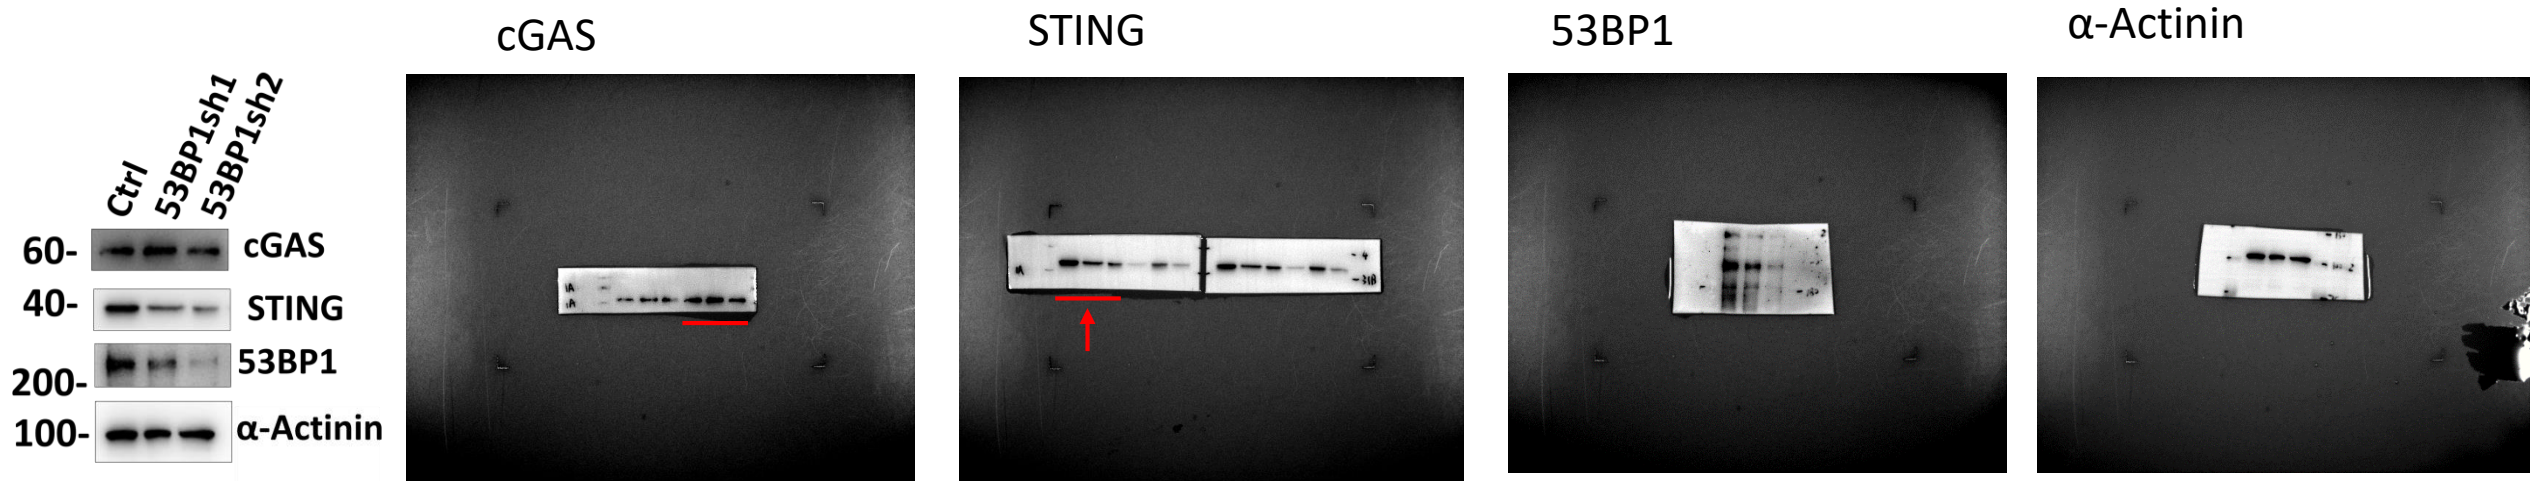

Supplement: 41418_2022_967_MOESM4_ESM.pdf [file 41418_2022_967_MOESM4_ESM.pdf]
