# Supplementary material for: Inhibition of cGAS-STING by JQ1 alleviates oxidative stress-induced retina inflammation and degeneration
Source: PubMed Central journal article supplement (PMC9433402; doi:10.1038/s41418-022-00967-4), 2022-03-28

**Fig. S1 IRF3 was not activated in mouse retina upon SI injection.**

**A**

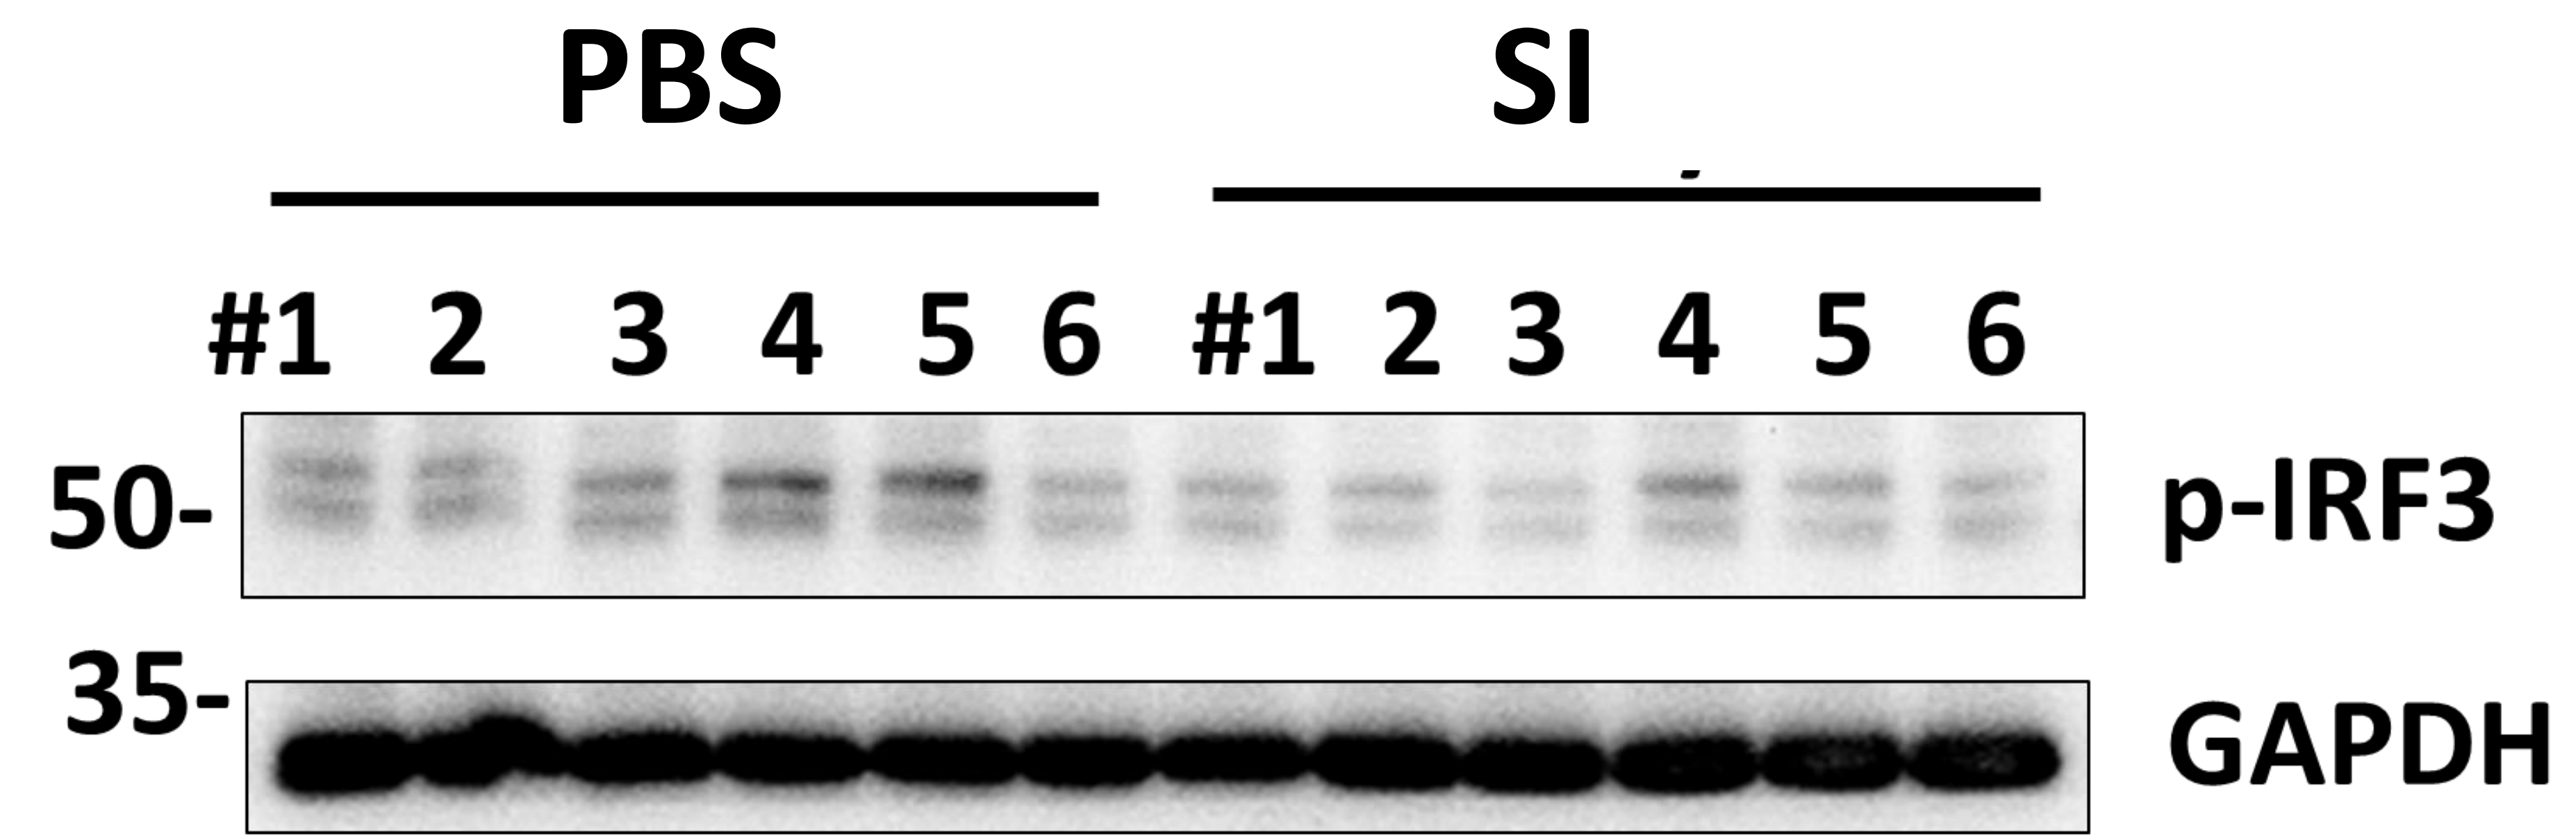

**B**

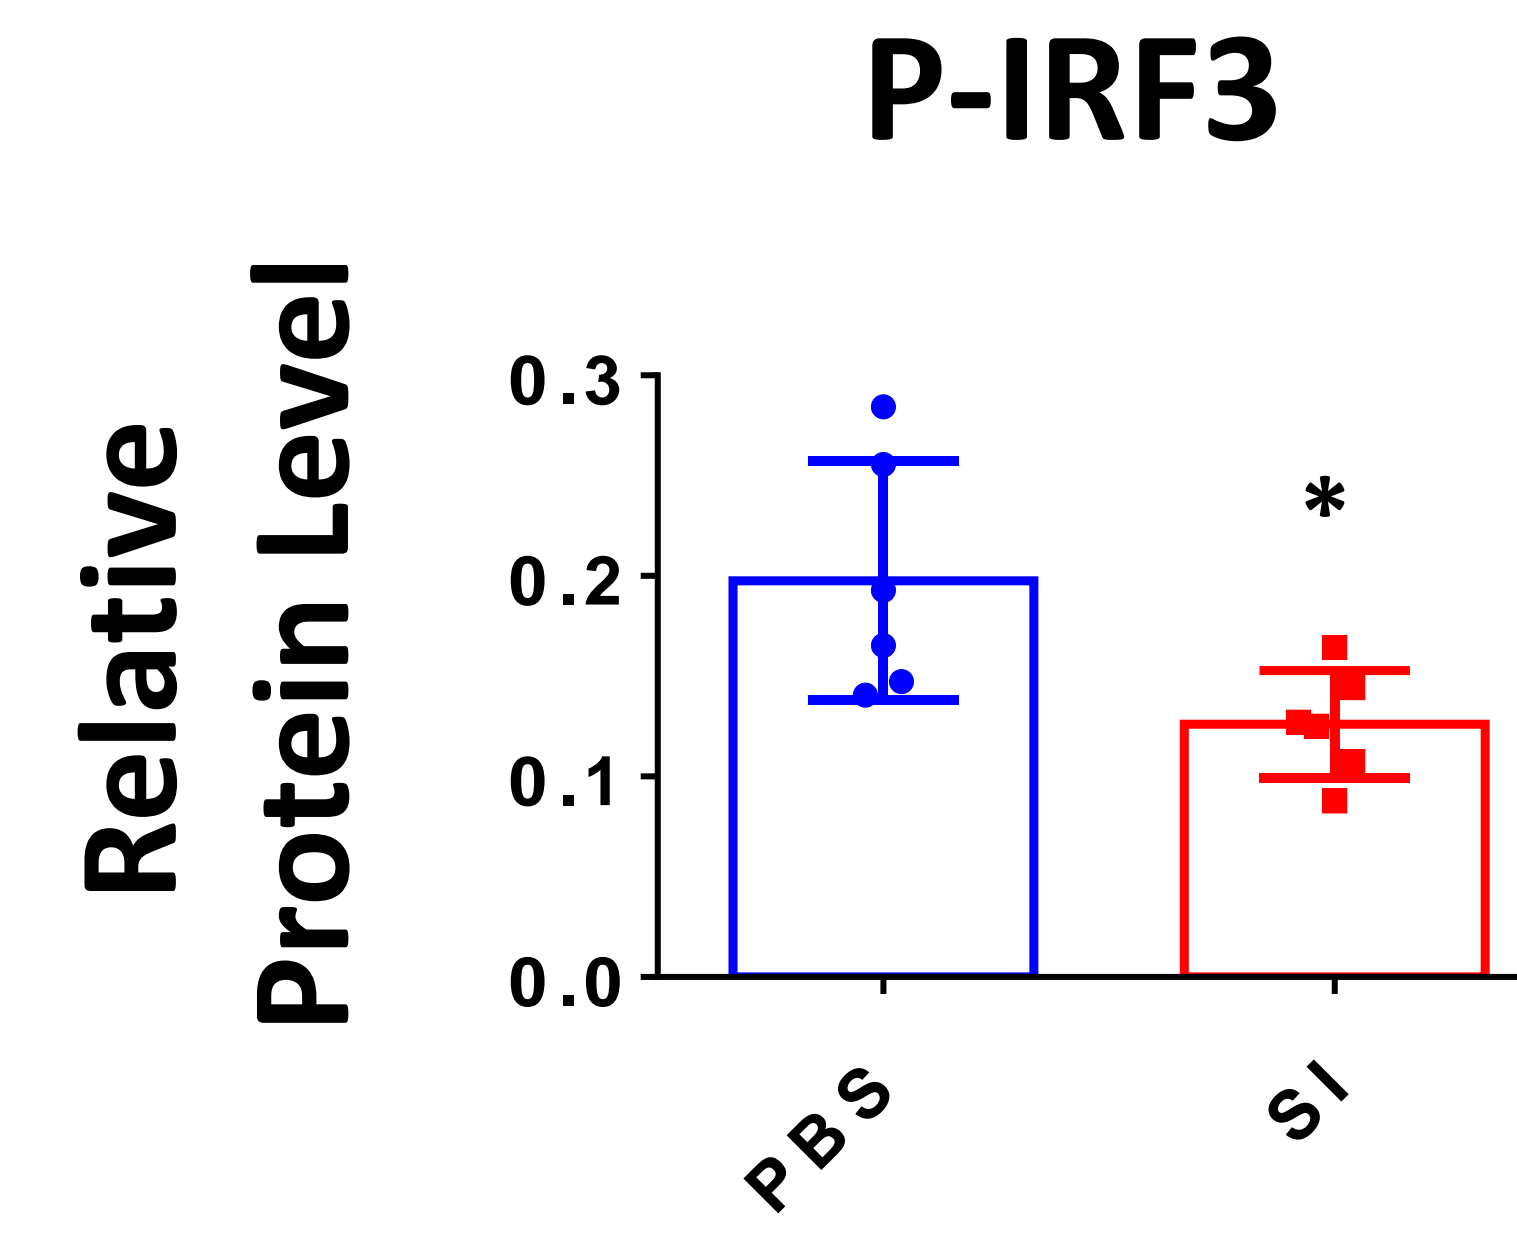

**C**

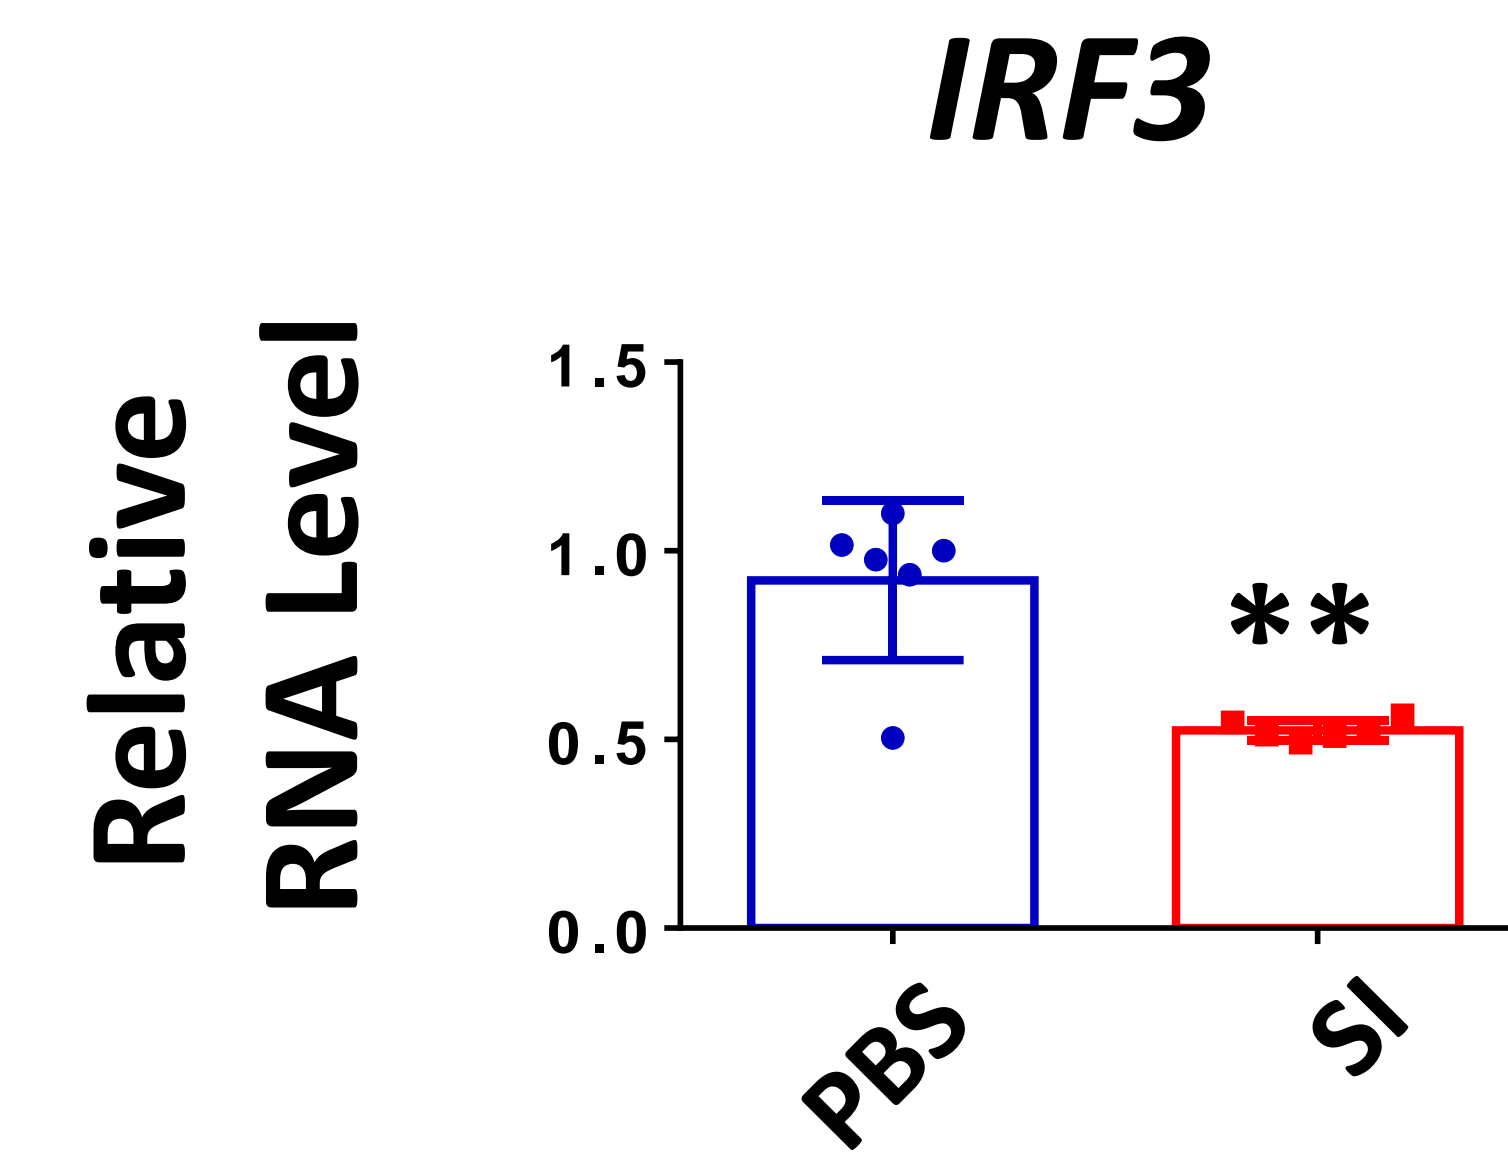

Supplement: 41418_2022_967_MOESM1_ESM.pdf [file 41418_2022_967_MOESM1_ESM.pdf]
